# **Shifting microbial communities sustain multi-year iron reduction and methanogenesis in ferruginous sediment incubations**

Marcus S. Bray<sup>1</sup>, Jieying Wu<sup>1</sup>, Benjamin C. Reed<sup>1</sup>, Cecilia B. Kretz<sup>2</sup>, Keaton M. Belli<sup>2</sup>, Rachel L. Simister<sup>3</sup>, Cynthia Henny<sup>4</sup>, Frank J. Stewart<sup>1,2</sup>, Thomas J. DiChristina<sup>1,2</sup>, Jay A. Brandes<sup>5</sup>, David A. Fowle<sup>6</sup>, Sean A. Crowe<sup>3</sup>, Jennifer B. Glass<sup>1,2#</sup>

<sup>1</sup>School of Biology, Georgia Institute of Technology, Atlanta, GA, 30332, USA

<sup>2</sup>School of Earth and Atmospheric Sciences, Georgia Institute of Technology, Atlanta, GA, 30332, USA

<sup>3</sup>Departments of Microbiology & Immunology and Earth, Ocean, & Atmospheric Sciences, University of British Columbia, Vancouver, BC, Canada

<sup>4</sup>Research Center for Limnology, Indonesian Institute of Sciences, Cibinong, Indonesia

<sup>5</sup>Skidaway Institute of Oceanography, Savannah, GA, 31411, USA

<sup>6</sup>Department of Geology, University of Kansas, Lawrence, KS, 66045, USA

<sup>#</sup>Correspondence: 311 Ferst Drive Atlanta, GA; Telephone: 404-894-3942; Fax: 404-894-5638; Email: [Jennifer.Glass@eas.gatech.edu](mailto:Jennifer.Glass@eas.gatech.edu)

Type: Research Article

## Abstract

Reactive Fe(III) minerals can influence methane (CH<sub>4</sub>) emissions by inhibiting microbial methanogenesis or by stimulating anaerobic CH<sub>4</sub> oxidation. The balance between Fe(III) reduction, methanogenesis, and methane oxidation in ferruginous Archean and Paleoproterozoic oceans would have controlled CH<sub>4</sub> fluxes to the atmosphere, thereby regulating the capacity for CH<sub>4</sub> to warm the early Earth under the Faint Young Sun. We studied CH<sub>4</sub> and Fe cycling in anoxic incubations of ferruginous sediment from the ancient ocean analogue Lake Matano, Indonesia over three successive transfers (500 days total). Iron reduction, methanogenesis, methane oxidation, and microbial taxonomy were monitored in treatments amended with ferrihydrite or goethite. After three dilutions, Fe(III) reduction persisted only in bottles with ferrihydrite. Enhanced CH<sub>4</sub> production was observed in the presence of goethite, highlighting the potential for reactive Fe(III)-oxides to inhibit methanogenesis. Supplementing the media with hydrogen, nickel and selenium did not stimulate methanogenesis. There was limited evidence for Fe(III)-dependent CH<sub>4</sub> oxidation, although some incubations displayed CH<sub>4</sub>-stimulated Fe(III)-reduction. 16S rRNA profiles continuously changed over the course of enrichment, with ultimate dominance of unclassified members of the order Desulfuromonadales in all treatments. Microbial diversity decreased markedly over the course of incubation, with subtle differences between ferrihydrite and goethite amendments. These results suggest that Fe(III)-oxide mineralogy and availability of electron donors could have led to spatial separation of Fe(III)-reducing and methanogenic microbial communities in ferruginous marine sediments, potentially explaining the persistence of CH<sub>4</sub> as a greenhouse gas throughout the first half of Earth history.

## INTRODUCTION

Elevated atmospheric methane ( $\text{CH}_4$ ; 100-1000 ppmv vs.  $\sim 2$  ppmv in the modern atmosphere) likely played an important role in the first half of Earth history by helping warm Earth's surface temperature enough to sustain liquid water under considerably lower solar radiation (Pavlov et al., 2000; Haqq-Misra et al., 2008; Kasting, 2005; Roberson et al., 2011). During this time, the main source of  $\text{CH}_4$  was likely hydrogenotrophic methanogenesis ( $\text{CO}_2 + 4 \text{H}_2 \rightarrow \text{CH}_4 + 2\text{H}_2\text{O}$ ; (Ueno et al., 2006; Battistuzzi et al., 2004) from anoxic oceans, which were ferruginous for most of the Archean and Paleoproterozoic eons (Poulton & Canfield, 2011). In these seas, a “ferrous wheel” would have cycled iron from dissolved  $\text{Fe}^{2+}$  to Fe(III) oxides via microbial photoferrotrophy (and/or abiotic photo-oxidation; Kappler et al., 2005; Crowe et al., 2008a), and then back to  $\text{Fe}^{2+}$  via microbial Fe(III) respiration (Craddock & Dauphas, 2011; Johnson et al., 2008; Vargas et al., 1998; Konhauser et al., 2005).

Ferruginous oceans could have influenced  $\text{CH}_4$  cycling by several mechanisms. It is well established that Fe(III)-reducing bacteria have higher affinity for  $\text{H}_2$  than hydrogenotrophic methanogens, and will therefore outcompete them in the presence of poorly crystalline Fe(III) oxides (e.g. ferrihydrite; Lovley & Phillips, 1987; Lovley & Goodwin, 1988; Zhou et al., 2014) [note that Fe(III)-reducing bacteria also outcompete acetoclastic methanogens (Lovley & Phillips, 1986), but acetoclastic methanogenesis likely evolved much later in Earth history (Fournier & Gogarten, 2008)]. In addition, evidence is accumulating that Fe(III) oxides can mediate or stimulate microbial  $\text{CH}_4$  oxidation, either as the direct oxidant (Ettwig et al., 2016; Gal'chenko, 2004), or indirectly by regenerating sulfate by oxidization of reduced sulfur compounds (Sivan et al., 2014).

The putative microbial metabolism of CH<sub>4</sub> oxidation coupled to Fe(III) reduction is thermodynamically favorable with ferrihydrite ( $\text{CH}_4 + 8 \text{Fe}(\text{OH})_3 + 15\text{H}^+ \rightarrow \text{HCO}_3^- + 8\text{Fe}^{2+} + 21\text{H}_2\text{O}$ ;  $\Delta G_r^0 = -571 \text{ kJ mol}^{-1} \text{ CH}_4$ ) and goethite ( $\text{CH}_4 + 8 \text{FeOOH} + 15\text{H}^+ \rightarrow \text{HCO}_3^- + 8\text{Fe}^{2+} + 13\text{H}_2\text{O}$ ;  $\Delta G_r^0 = -355 \text{ kJ mol}^{-1} \text{ CH}_4$ ) as terminal electron acceptors (Caldwell et al., 2008; Zehnder & Brock, 1980). Based on the chemical equations and free energy yields above, we would expect to observe a stoichiometric ratio of 1 CH<sub>4</sub> oxidized per 8 Fe(III) reduced and preferential use of ferrihydrite over goethite as the electron acceptor. Accumulating geochemical evidence for microbial CH<sub>4</sub> oxidation coupled to, or stimulated by, Fe(III) reduction is widespread across modern anoxic ecosystems and anaerobic digester communities (Sivan et al., 2011; Segarra et al., 2013; Beal et al., 2009; Amos et al., 2012; Riedinger et al., 2014; Noroi et al., 2013; Crowe et al., 2011; Sturm et al., 2015; Egger et al., 2015; Zehnder & Brock, 1980; Sivan et al., 2014; Fu et al., 2016; Rooze et al., 2016), and a recent study reported simultaneous CH<sub>4</sub> oxidation and ferrihydrite reduction in a 1:8 ratio in an archaea-dominated enrichment culture (Ettwig et al., 2016).

Despite the possible importance of coupled Fe(III) and CH<sub>4</sub> cycling in the Archean and Paleoproterozoic Eon, long-term studies of Fe(III) reduction under low organic carbon and high CH<sub>4</sub> conditions remain sparse. Lake Matano, Indonesia is one of the only modern analogues for the ferruginous Archean ocean (Crowe et al., 2008a). Despite the abundance of Fe(III) oxides that might be expected to suppress methanogenesis, CH<sub>4</sub> accumulates to 1.4 mM in anoxic deep waters (Crowe et al., 2008a; Crowe et al., 2011; Crowe et al., 2008b; Crowe et al., 2007a; Kuntz et al., 2015). Methanotrophy is a key carbon fixation process in Lake Matano's oxic-anoxic transition zone, and the dearth of other oxidants (<100 nM nitrate and sulfate) suggests that Fe(III) might be the terminal electron acceptor in methanotrophy (Sturm et al., 2015; Crowe et

al., 2011). In this study, we examined the influence of CH<sub>4</sub> and Fe(III) mineral speciation on rates of Fe(III) reduction, methanogenesis, and CH<sub>4</sub> oxidation, and microbial community composition, over three successive dilutions (500 total days of incubation) of anoxic Lake Matano sediments.

## **MATERIALS AND METHODS**

### **Sample collection and storage**

A 15-cm sediment core from 200 m water depth in Lake Matano, Sulawesi Island, Indonesia (2°26'S, 121°15'E; *in situ* sediment temperature ~27°C) was sampled in November 2010 and sub-sampled at 5 cm increments. Sediments from 0-5 and 5-10 cm depth were fluffy and black, and 10-15 cm was dark gray. Sediments were sealed in gas-tight bags with no headspace (Hansen et al., 2000) and stored at 4°C until incubations began in March 2015.

### **Enrichment medium and substrate synthesis**

A modified artificial freshwater medium lacking nitrate and sulfate was developed based on the pore water composition of Lake Matano sediments (S.A. Crowe and D.A. Fowle, unpublished work). The medium contained 825 µM MgCl<sub>2</sub>, 550 µM CaCO<sub>3</sub>, 3 mM NaHCO<sub>3</sub>, 3.5 µM K<sub>2</sub>HPO<sub>4</sub>, 5 µM Na<sub>2</sub>HPO<sub>4</sub>, 225 µM NH<sub>4</sub>Cl, 1 µM CuCl<sub>2</sub>, 1.5 µM Na<sub>2</sub>MoO<sub>4</sub>, 2.5 µM CoCl<sub>2</sub>, 23 µM MnCl<sub>2</sub>, 4 µM ZnCl<sub>2</sub>, 9.4 µM FeCl<sub>3</sub> and 3 mM Na<sub>2</sub>NTA, 0.07 µM vitamin B<sub>12</sub>, 0.4 µM biotin, and 68.5 µM thiamine. Filter-sterilized vitamin solutions were added after autoclaving. Ferrihydrite (Fe(OH)<sub>3</sub>) and goethite (FeOOH) were synthesized as described in Schwertmann & Cornell (1991) and added to enrichments to 10 mM as described below.

## Inoculation of enrichment and amendments

The sediment was pre-treated for 36 days at 30°C in 100% N<sub>2</sub> headspace to deplete endogenous organic carbon, electron donors, and reactive electron acceptors. After pre-treatment, sediment from the 0-5 cm depth layer was inoculated in a ratio of sediment to medium of 1:5 (v/v) in an anoxic chamber (97% N<sub>2</sub> and 3% H<sub>2</sub>; Coy Laboratory Products, Grass Lake, MI, USA). Sediment slurry (35 mL) was aliquoted into 70 mL sterile serum bottles, stoppered with sterile butyl stoppers (Geo-Microbial Technologies, Ochelata, OK, USA; pre-boiled in 0.1 N NaOH), and crimped with aluminum seals. Ferric iron was added either as ferrihydrite or goethite to 10 mM. Bottles were purged with 99.99% N<sub>2</sub> for 1 hr, and CH<sub>4</sub> amendments were injected with 10 mL 99.99% CH<sub>4</sub> and 5 mL 99% <sup>13</sup>CH<sub>4</sub> (Cambridge Isotope Laboratories, Tewksbury, MA, USA). Controls were autoclaved at 121°C for 1 hr on day 0 and again on day 6 of the 1° enrichment. All treatments were duplicated, and bottles were incubated in the dark at 30°C with shaking at 200 rpm.

After 50 days, the volume of all cultures was reduced to 5 mL, and 30 mL of fresh media was added to each bottle, constituting a 6-fold dilution. These 2° enrichments were amended with approximately 10 mM of either ferrihydrite or goethite. All bottles were purged with 99.99% N<sub>2</sub> for 1 hr, and all bottles except N<sub>2</sub> controls were injected with 8 mL 99.99% CH<sub>4</sub> and 2 mL 99% <sup>13</sup>CH<sub>4</sub>. Controls were autoclaved again at 121°C for 1 hr. DL-Methionine (10 μM) was added as a sulfur source. After 303 days, cultures were diluted 10-fold with fresh media into new serum bottles (3° enrichment) with the same substrate and headspace composition as the 2° enrichment. A schematic of the incubation and dilutions is shown at the top of Figures 1-3.

After an additional 220 days, goethite-amended N<sub>2</sub> cultures were diluted 25-fold with fresh anoxic media into new serum bottles. Cultures received either 10 mM goethite or no Fe(III). A subset of cultures received 5 mL of 99.99% H<sub>2</sub> (20% headspace) while all others had 100% N<sub>2</sub> headspace. Controls were autoclaved at 121°C. After 48 days, an anoxic solution of nickel (Ni) and selenium (Se) was added to all bottles, yielding final concentrations of 1 μM Ni and 1 μM Se.

#### **HCl-extractable Fe<sup>2+</sup> and Fe<sup>3+</sup> and soluble Fe<sup>2+</sup>**

Samples were taken from each bottle in the anoxic chamber using a 21-gauge needle (BD PrecisionGlide™) and plastic syringe. Plasticware was stored in the anoxic chamber for at least 24 hr to minimize O<sub>2</sub> sample contamination. For HCl-extractable Fe<sup>2+</sup> analyses, 100 μL of sediment slurry was extracted with 400 μL 0.5 N HCl in the dark for 1 hr, followed by centrifugation at 10,000 x g for 1 min, injection of 10 μL of supernatant into 990 μL of 10 mM FerroZine reagent in 46 mM HEPES (pH 8.3), and measurement of absorbance at 562 nm (Stookey, 1970). For HCl-extractable Fe<sup>3+</sup>, 100 μL of sediment slurry was incubated overnight in 0.5 N HCl and 0.25 M NH<sub>2</sub>OH-HCl in the dark, followed by centrifugation and measurement as above, and subtraction of HCl-extractable Fe<sup>2+</sup> as in Kostka & Luther (1994).

#### **Methane oxidation**

Samples were collected for δ<sup>13</sup>C-DIC analysis by 0.2 μm membrane filtration of medium into crimp top autosampler vials (Thermo Scientific National Target LoVial) and analysis as described in Brandes (2009). Rates of <sup>13</sup>CH<sub>4</sub> oxidation to <sup>13</sup>C-DIC were calculated over the linear period of δ<sup>13</sup>C-DIC increase based on the method in Scheller et al. (2016). First, the δ<sup>13</sup>C-DIC

values were converted into fractional abundances ( $^{13}\text{F} = (^{13}\text{C}/^{12}\text{C} + ^{13}\text{C})$ ), and then DIC production from  $\text{CH}_4$  oxidation was calculated using the following formula:

$$\Delta[\text{DIC}] = ([\text{DIC}]_n(^{13}\text{F}_n) - [\text{DIC}]_0(^{13}\text{F}_0)) / ^{13}\text{F}_{\text{CH}_4}$$

Where  $[\text{DIC}]_n$  and  $^{13}\text{F}_n$  are equal to the total DIC concentration (mM) and fractional abundance of  $^{13}\text{C}$  in the DIC at time n respectively.  $[\text{DIC}]_0$  and  $^{13}\text{F}_0$  are the total DIC concentration (mM) and fractional abundance of DIC at time 0 respectively, and  $^{13}\text{F}_{\text{CH}_4}$  is the fractional abundance of  $^{13}\text{C}$  in the  $\text{CH}_4$ .

## Headspace methane

Headspace (50  $\mu\text{L}$ ) was sampled using a gastight syringe and injected into a gas chromatograph (SRI Instruments 8610C, Torrance, CA, USA) with a HayeSep N column and flame ionization detector to measure headspace  $\text{CH}_4$  concentrations. A  $\text{CH}_4$  standard (1000 ppm, Airgas, USA) was used for calibration.

## Inductively coupled plasma mass spectrometry

Total dissolved Ni and Se concentrations were measured using inductively coupled plasma mass spectrometry (ICP-MS). In order to determine the amounts of Ni and Se supplied by the media and Fe(III) oxides, aliquots of media were dispensed in serum bottles, purged with 99.99%  $\text{N}_2$ , and amended with 10 mM goethite or ferrihydrite in the same manner as enrichments. Stoppers were penetrated multiple times with 21 gauge stainless steel needles (BD PrecisionGlide™) to mimic the effect of sampling on enrichment cultures. All samples for ICP-MS were filtered through 0.2  $\mu\text{m}$  pore polypropylene syringe filters and diluted in 2% trace metal grade  $\text{HNO}_3$  (Fisher Scientific, Inc.) containing scandium and yttrium as internal standards to account for



instrument drift. Calibration standards were prepared from certified stock solutions of Ni (CertiPREP) and Se (BDH), and a blank and calibration standard were measured periodically as quality controls. The measurement detection limits, calculated as 3 times the standard deviation of the blank (n=8), were 7 and 128 nM for Ni and Se, respectively.

# **16S rRNA gene amplicon sequencing**

Samples (2 mL) of sediment used for inoculating incubations (hereafter, “sediment inoculum”) were taken in February 2015 (prior to pre-treatment) and after incubation for 15 days (1° enrichment), 72 days (2° enrichment) and 469 days (3° enrichment). Nucleic acid was extracted and purified using a MO BIO PowerSoil Isolation Kit following the manufacturer’s protocol and MO BIO UltraClean® 15 Purification Kit. 16S rRNA gene amplicons were synthesized from extracted DNA with V4 region-specific barcoded primers F515 and R806 (Caporaso et al., 2011) appended with Illumina-specific adapters according to Kozich et al. (2013) using a Bio-Rad C1000 Touch Thermocycler and QIAGEN Taq PCR Master Mix. Thermal cycling conditions were as follows: initial denaturing at 94°C (5 min), 35 cycles of denaturing at 94°C (40 sec), primer annealing at 55°C (40 sec), and primer extension at 68°C (30 sec). Amplicons were checked for correct size (~400 bp) on a 1% agarose gel and purified using Diffinity RapidTips. Amplicon concentrations were determined on a Qubit™ (ThermoFisher) fluorometer. Amplicons were pooled at equimolar concentrations (4 nmol), and sequenced on an Illumina MiSeq running MiSeq Control software v.2.4.0.4 using a 500 cycle MiSeq reagent kit v2 with a 5% PhiX genomic library control, as described by Kozich et al. (2013). Sequences were deposited as NCBI accession numbers SAMN04532568-04532641 and SAMN05915184-05915222.

# **16S rRNA gene amplicon sequence analysis**

Demultiplexed amplicon read pairs were quality trimmed with Trim Galore (Babraham Bioinformatics) using a base Phred33 score threshold of Q25 and a minimum length cutoff of 100 bp. Reads were then analyzed using mothur (Schloss et al., 2009) following its MiSeq standard operating procedure. High quality paired reads were merged and screened to remove sequences of incorrect length and those with high numbers of ambiguous base calls. Merged reads were dereplicated and aligned to the ARB SILVA database (release 123; available at [http://www.mothur.org/wiki/Silva\\_reference\\_alignment](http://www.mothur.org/wiki/Silva_reference_alignment)). Sequences with incorrect alignment and those with homopolymers longer than 8bp were filtered out. Unique sequences and their frequency in each sample were identified and then a pre-clustering algorithm was used to further de-noise sequences within each sample. Sequences were then chimera checked using UCHIME (Edgar et al., 2011). Reads were clustered into OTUs at 97% similarity based on uncorrected pairwise distance matrices. OTUs were classified using SILVA reference taxonomy database (release 123, available at [http://www.mothur.org/wiki/Silva\\_reference\\_files](http://www.mothur.org/wiki/Silva_reference_files)). Chao 1 (species richness), phylogenetic diversity, and Shannon index (species evenness) estimates were generated using mothur after normalization to 4000 sequences per sample.

## RESULTS

### Iron reduction

*1° enrichment.* Over the first 10 days of incubation, HCl-extractable  $\text{Fe}^{2+}$  increased from 10 to 25 mM in ferrihydrite treatments (Fig. 1a) and from 10 to 20 mM in goethite treatments (1-2 mM  $\text{d}^{-1}$ ; Fig. 1b). From day 6 to 10, HCl-extractable  $\text{Fe}^{3+}$  (7 and 12 mM in ferrihydrite and goethite treatments, respectively) was completely consumed in all bottles except autoclaved controls with ferrihydrite (data not shown). Iron reduction rates were identical with and without  $\text{CH}_4$  (Fig. 1a, b). Initial autoclaving did not suppress Fe(III) reduction. A second round of autoclaving on day 6

slightly suppressed further activity. From day 10-28, HCl-extractable  $\text{Fe}^{2+}$  fluctuated in ferrihydrite treatments (Fig. 1a) and declined slightly in goethite treatments (Fig. 1b). Soluble  $\text{Fe}^{2+}$  was consistently <1% of HCl-extractable  $\text{Fe}^{2+}$ , and sediment-free controls did not reduce Fe(III) (data not shown).

*2° enrichment.* After 1:6 dilution and 10 mM ferrihydrite addition on day 50, HCl-extractable  $\text{Fe}^{2+}$  increased from 3 to 4 mM over two days, and then remained constant through the final time point (day 497) in bottles with and without added  $\text{CH}_4$  (Fig. 1a). After 10 mM goethite addition on day 50, HCl-extractable  $\text{Fe}^{2+}$  increased from 2 to 3 mM after a two-day lag period. Thereafter, HCl-extractable  $\text{Fe}^{2+}$  rose to 4 mM by day 497 in goethite treatments with added  $\text{CH}_4$ ; without  $\text{CH}_4$ , HCl-extractable  $\text{Fe}^{2+}$  dropped back to 2 mM (Fig. 1b). Autoclaved controls had no activity. Black magnetic minerals formed in all ferrihydrite treatments except autoclaved controls (Fig. 1a). No magnetic minerals formed in goethite treatments (Fig. 1b).

*3° enrichment.* After 1:10 dilution and addition of 10 mM ferrihydrite on day 352, HCl-extractable  $\text{Fe}^{2+}$  doubled in the first week in  $\text{N}_2$  treatments and bottle  $\text{CH}_4$ -1 (Fig. 1a). Bottle  $\text{CH}_4$ -2 displayed similar activity after a two-week lag period. Over an additional 100 days (day 466), HCl-extractable  $\text{Fe}^{2+}$  increased to 2 mM. Goethite treatments and autoclaved controls had minimal activity (Fig. 1b). As in the 2° enrichment, magnetic minerals formed in the presence of ferrihydrite (Fig. 1a), but not goethite (Fig. 1b).

## Trace metal concentrations

Total dissolved Ni averaged  $41 \pm 20$  nM in fresh basal growth media, and was neither affected by Fe(III) oxide additions nor by puncturing of stainless steel needles through stoppers into culture liquid (Table S1). Dissolution of ferrihydrite in  $\text{HNO}_3$  liberated significant Ni (2.5  $\mu\text{M}$ ;

Table S1). Nickel was higher in enrichment cultures than in basal media: 96-286 and 54-134 nM with ferrihydrite and goethite, respectively; Table S2). Selenium was consistently below the detection limit (<128 nM) in growth media and enrichments culture.

## **Methane production**

Goethite treatments consistently displayed higher CH<sub>4</sub> production than those with ferrihydrite (Fig. 2). In the 1° goethite enrichment, methanogenesis (13-19 μM CH<sub>4</sub> d<sup>-1</sup>) coincided with the period of Fe(III) reduction, and stopped after HCl-extractable Fe<sup>3+</sup> was completely consumed on day 10. Methanogenesis persisted throughout the 3° goethite enrichment (3 μM CH<sub>4</sub> d<sup>-1</sup>). Negligible CH<sub>4</sub> was produced in the presence of ferrihydrite, except for the final timepoint for bottle N<sub>2</sub>-2 in the 3° enrichment.

In an additional 4° enrichment (day 571-663), we tested the effect of H<sub>2</sub>, Ni, and Se amendments, as well as no Fe(III) controls, on CH<sub>4</sub> production in goethite treatments (Fig. S1). As in previous enrichments, Bottle 1 consistently produced more CH<sub>4</sub> (17 μM CH<sub>4</sub> d<sup>-1</sup>) than Bottle 2. There were no significant differences in CH<sub>4</sub> production with and without 20% H<sub>2</sub> headspace and 10 mM goethite. Like in previous enrichments with goethite, minimal Fe(III) reduction was observed (data not shown). No CH<sub>4</sub> was produced in any of the treatments between day 619, when 1 μM Ni and Se were added, and day 663.

## **Methane oxidation**

*1° enrichment.* <sup>13</sup>C incorporation into DIC began on day 6 in both ferrihydrite and goethite treatments and continued for the remainder of the sampling period (Fig. 3a,b). Ferrihydrite treatments showed lower <sup>13</sup>C-DIC enrichment but higher total DIC production (totaling to 1-2

$\mu\text{M CH}_4$  oxidized  $\text{d}^{-1}$ ) than goethite treatments, which had greatest  $\delta^{13}\text{C}$  enrichment but decreasing DIC concentrations, making calculation of  $\text{CH}_4$  oxidation rates impossible. Autoclaved controls showed neither  $^{13}\text{C}$  incorporation nor DIC production.

*2° enrichment.* Both ferrihydrite treatments displayed  $^{13}\text{C}$  enrichment (Fig. 3a), but declining DIC, precluding calculation of  $\text{CH}_4$  oxidation rates. Initial pH of 8 declined to 7.6, 6.7 and 6 in the autoclaved,  $\text{N}_2$  and  $\text{CH}_4$  treatments, respectively. DIC in goethite treatments with  $\text{CH}_4$  dropped to undetectable values within three weeks, suggesting sampling or analytical error, which precluded accurate isotopic measurement at these time points. These data are thus not considered further. Autoclaved and  $\text{N}_2$  controls did not show pH changes.

*3° enrichment.* Bottle  $\text{CH}_4$ -2 with ferrihydrite was the only treatment with significant  $^{13}\text{C}$  incorporation into DIC over the first 15 days (Fig. 3a). Over the same interval, DIC increased in both ferrihydrite-amended bottles (yielding  $\text{CH}_4$  oxidation rates of 32 and 7  $\mu\text{M d}^{-1}$  in bottle 1 and 2, respectively) and pH dropped from 8.2 to 7.1 and 7.9 in bottles 1 and 2, respectively. By day 470,  $^{13}\text{C}$  enrichment and DIC concentrations in both ferrihydrite-amended bottles had returned to a level similar to that at the start of the 3° enrichment. Autoclaved controls did not exhibit any change in DIC and pH. Goethite treatments had initial DIC concentrations (3-5 mM) higher than those in previous enrichments. In the goethite-amended autoclaved controls and bottle  $\text{CH}_4$ -1, DIC concentrations dropped over the 3° enrichment. Only goethite-amended bottle  $\text{CH}_4$ -2 increased in DIC, without concurrent  $^{13}\text{C}$  enrichment. Large DIC variability implies that reported rates may be underestimates if declining pH led to outgassing of  $^{13}\text{C}$ -DIC into the headspace  $\text{CO}_2$  pool.

## Microbial taxonomy

*Inoculum*. 16S rRNA gene amplicons from the sediment inoculum were dominated by Bathyarchaeota (25%), formerly Miscellaneous Crenarchaeotal Group (MCG) and unclassified Archaea (11%; Fig. 4).

*1° enrichment*. Species richness, evenness and phylogenetic diversity decreased relative to the inoculum in all treatments (Fig. 4). Geobacteraceae (Deltaproteobacteria) became dominant (22-36%) in all ferrihydrite treatments (Fig. 4a); the dominant OTU had 97% similarity to *Geothermobacter* sp. Ferrihydrite-amended bottle CH<sub>4</sub>-1 was enriched in the Betaproteobacteria, specifically Comamonaceae (17%) and Rhodocyclaceae (9%; Fig. 4a). Bathyarchaeota persisted in goethite treatments (11-25%; Fig. 4b).

*2° enrichment*. All treatments declined further in species richness, evenness, and phylogenetic diversity. Unclassified Desulfuromonadales dominated both ferrihydrite and goethite enrichments (34-68%). The dominant OTU had 98% similarity to *Geobacter hephaestius*/*Geobacter lovleyi*. Geobacteraceae declined in ferrihydrite enrichments (2-18%; Fig. 4a). Campylobacteraceae (Epsilonproteobacteria), a trace constituent of the inoculum and 1° enrichment, were enriched in goethite treatments with CH<sub>4</sub> (23-40%); the dominant OTU had 98% similarity to *Sulfurospirillum barnesii* (Fig. 4b). The most abundant methanogenic Euryarchaeota family, Methanobacteriaceae, comprised 1-2% and 6-7% of sequences in ferrihydrite and goethite treatments, respectively; the dominant OTU had 100% similarity to *Methanobacterium flexile*. Bathyarchaeota were depleted compared to the 1° enrichment (Fig. 4).

*3° enrichment*. Species richness, evenness, and phylogenetic diversity continued to decline (Fig. 4a,b). Unclassified Desulfuromonadales dominated goethite treatments (32-76%; Fig. 4b), and were less abundant in ferrihydrite treatments (18-38%); as in the 2° enrichment, the dominant

OTU had 98% identity to *Geobacter hephaestius*/*Geobacter lovleyi*. Rhodocyclaceae were more abundant in ferrihydrite treatments with CH<sub>4</sub> (14-15%) than with N<sub>2</sub> (2-4%; Fig 4a); the dominant OTU had 100% similarity to *Azospira oryzae*/*Dechlorosoma suillum*. Peptococcaceae (Firmicutes) were most abundant in bottle CH<sub>4</sub>-2 with ferrihydrite (30%); the dominant OTU had 96% similarity to uncultured members of the genus *Thermincola*. Syntrophaceae (Deltaproteobacteria) were enriched in all ferrihydrite treatments (11-16%) and goethite treatments with N<sub>2</sub> (8-15%); the dominant OTU had 97% similarity to *Smithella propionica*. Methanobacteriaceae comprised 1-4% of sequences in goethite treatments and were absent from ferrihydrite treatments; as in the 2° enrichment, the dominant OTU had 100% identity to *Methanobacterium flexile*.

## DISCUSSION

### Fe(III) reduction rates in long-term ferruginous sediment incubations

Initial rates of HCl-extractable Fe<sup>2+</sup> production (1-2 mM d<sup>-1</sup>) in the 1° enrichment were similar to those from freshwater wetlands with organic carbon as the electron donor (Roden & Wetzel, 2002; Jensen et al., 2003; Kostka et al., 2002). Despite replenishment of Fe(III) substrates, activity declined with each successive transfer, likely reflecting organic carbon limitation. The next most thermodynamically favorable electron donor, H<sub>2</sub>, could have been supplied by fermenters (such as Syntrophaceae in the 3° enrichment), but would ultimately still require a source of organic carbon. Some of our incubations display evidence for CH<sub>4</sub>, the next most thermodynamically favorable electron donor, as a source of electrons for Fe(III) reduction (e.g. higher Fe<sup>2+</sup> yields with CH<sub>4</sub> addition with ferrihydrite in 1° and 3° enrichments, and with goethite in the 2° enrichment; see further discussion below).

Higher Fe(III) reduction rates were maintained on ferrihydrite than goethite, consistent with its higher energetic yield and (typically) greater surface area. Magnetic mineral formation was likely due to adsorption of  $\text{Fe}^{2+}$  onto ferrihydrite followed by solid-state conversion of ferrihydrite to magnetite (Hansel et al., 2003). Since the HCl-extraction method does not dissolve magnetite and magnetite-adsorbed  $\text{Fe}^{2+}$  (Poulton & Canfield, 2005), it is possible that our Fe(III) reduction rates based on HCl-extractable Fe(II) production were underestimates of the total Fe(III) reduction.

### **Fe(III) oxide mineralogy controls methane production and methanogen taxonomy**

Our observation of higher rates of methanogenesis in goethite vs. ferrihydrite amendments is consistent with prior results showing that bacteria that reduce ferrihydrite better outcompete methanogenic archaea for  $\text{H}_2$  and acetate than those that reduce more crystalline Fe(III) oxides, including goethite (Lovley & Phillips, 1987; Lovley & Goodwin, 1988; Zhou et al., 2014; Hori et al., 2010; Roden & Wetzal, 1996). This out competition is also broadly supported by taxonomic shifts in our enrichment cultures. In particular, anaerobic heterotrophs such as *Geothermobacter sp.* (Kashefi et al., 2003) were enriched in ferrihydrite treatments by day 15 and may have outcompeted other microbes for organic carbon sources.

Higher abundances of Methanobacteriaceae (0.1-1% and 1-4% on days 15 and 469, respectively) in goethite than ferrihydrite treatments ( $\leq 0.1\%$ ) suggest that  $\text{CH}_4$  in goethite treatments came from the substrates used by Methanobacteriaceae ( $\text{H}_2/\text{CO}_2$ , formate, or CO). Addition of  $\text{H}_2$  did not stimulate additional methanogenesis in the 4° amendment, implying another limiting substrate or growth condition. The ferrihydrite treatment (bottle 2) that produced  $\text{CH}_4$  by day 469 contained 3% Methanosaetaceae; the most dominant OTU had 98% similarity to



*Methanosaeta concilii*, in agreement with observations from the Lake Matano water column (Crowe et al., 2011). *Methanosaeta* spp. produce CH<sub>4</sub> from acetate, or from H<sub>2</sub>/CO<sub>2</sub> via direct interspecies electron transfer with *Geobacter* (Rotaru et al., 2014).

### **Fe(III)-dependent CH<sub>4</sub> oxidation**

Enrichments were established under conditions thought to be favorable for Fe(III)-dependent CH<sub>4</sub> oxidation, with Fe(III) oxides and CH<sub>4</sub> as the most abundant electron acceptors and donors, respectively. In the 1° enrichment, incorporation of <sup>13</sup>CH<sub>4</sub> into DIC overlapped with the second phase of Fe(III) reduction (days 6-10), but calculating the stoichiometry of CH<sub>4</sub> oxidized to Fe(III) reduced posed a challenge due to similar rates of Fe(III) reduction with and without added CH<sub>4</sub> and in autoclaved controls. <sup>13</sup>C-DIC enrichment from the back reaction of hydrogenotrophic methanogenesis (Zehnder & Brock, 1979) was ruled out because CH<sub>4</sub> oxidation continued after Fe(III) reduction and methanogenesis stopped at day 10. Therefore, CH<sub>4</sub> was likely oxidized by an electron acceptor other than Fe(III) (e.g. O<sub>2</sub>, Mn(IV), NO<sub>x</sub><sup>-</sup>, SO<sub>4</sub><sup>2-</sup>) in the 1° enrichment, likely supplied by residual sediment or inadvertent introduction of air.

During the first 15 days of the 3° enrichment, rates of CH<sub>4</sub> oxidation and HCl-extractable Fe<sup>2+</sup> production were similar (~10-20 μM d<sup>-1</sup>) and roughly consistent with the low rates presented in Ettwig et al. (2016) that yielded a 1:8 ratio. However, the lack of multiple time points for the interval of simultaneous Fe(III) reduction and CH<sub>4</sub> oxidation, as well as similar initial rates of Fe(III) reduction with and without CH<sub>4</sub> throughout this interval, prevent us from attributing this activity to Fe(III)-dependent CH<sub>4</sub> oxidation with high confidence.

It is notable that the two incubations with the highest rates of CH<sub>4</sub> oxidation (ferrihydrite bottle 1 in 1° and 3° enrichments) were also the only treatments with very different microbial

community compositions relative to other bottles in the same enrichment. In the 1° enrichment, ferrihydrite bottle-1 was enriched in Betaproteobacteria (Comamonadaceae and Rhodocyclaceae). In the 3° enrichment, the CH<sub>4</sub>-1 sample had less Peptococcaceae than other ferrihydrite incubations. By day 469, the betaproteobacterium *Azospira oryzae/Dechlorosoma suillum*, a member of the Rhodocyclaceae family, was more abundant in both of the CH<sub>4</sub> vs. N<sub>2</sub> treatments. The potential role of this microbe in CH<sub>4</sub> cycling remains unclear, as laboratory cultures of this species are not known to oxidize CH<sub>4</sub>. Notably, related members of the Betaproteobacteria, including the genera *Azospira* and *Comamonas* found here, are typically facultative anaerobes that can use alternative electron acceptors like NO<sub>3</sub><sup>-</sup>, NO<sub>2</sub><sup>-</sup> or perchlorate (Willems, 2014; Reinhold-Hurek & Hurek, 2015). As such, these Betaproteobacteria are poised to respond to enhanced electron acceptor supply that accompanies pulse of O<sub>2</sub>. Anecdotally, Betaproteobacteria are frequently associated with environments that are characterized by fluctuating redox conditions and periodic exposure to O<sub>2</sub> (Converse et al., 2015). Thus, their growth in our incubations may be a response to trace O<sub>2</sub> introduction. It is also possible that the growth of novel organisms capable of high rates of Fe(III)-dependent CH<sub>4</sub> oxidation was inhibited by other unidentified factors, potentially related to the batch-style incubations, the use of butyl rubber stoppers (Niemann et al., 2015), or the lack of a critical substrate in the enrichment medium.

### **Effect of Fe(III) oxide and carbon substrates on microbial community diversity**

The microbial community underwent multiple shifts over the 500-day incubation, with an overall decrease in species richness, evenness, and phylogenetic diversity, likely in response to declining organic carbon. By the 3° enrichment, species evenness was consistently lower in each goethite-

amended treatment than in the respective ferrihydrite-amended treatment. This could mean that the greater energetic yield of ferrihydrite reduction fosters higher diversity, or that the higher reactivity of ferrihydrite allowed it to be utilized by more organisms than goethite.

All of the most enriched taxa in our enrichments comprised  $\leq 0.1\%$  of the inoculum community and have relatives that reduce Fe(III) in laboratory cultures. Within those taxa, the most abundant OTUs were closely related to organisms capable of Fe(III) reduction (*Geothermobacter* sp., *Geobacter hephaestius*/*Geobacter lovleyi*, *Thermincola* sp., and *Sulfurospirillum barnesii*) (Kashefi et al., 2003; Zavarzina et al., 2007; Stolz et al., 1999). Desulfuromonadales was the only metal-reducing taxon that was continuously present in all enrichments (3-11%, 34-53%, and 18-76% in the, 1°, 2°, and 3° enrichment respectively). Other taxa differed significantly in their abundance over the course of incubation. Geobacteraceae was enriched at day 15 with ferrihydrite (22-36%) but had declined in abundance by day 72 (8-18%). Still other taxa, including Rhodocyclaceae and Peptococcaceae, were enriched in the presence of ferrihydrite at day 469. In goethite treatments, Campylobacteraceae (23-40%) were enriched at day 72, but were minimal at day 469. The succession of different metal-reducing taxa may be due to the changing availability of electron donors (e.g. H<sub>2</sub> and organic C). Enrichment of Syntrophaceae, known for their syntrophic fermentative interactions, suggests the establishment of syntrophy in the 3° enrichment in response to depletion of electron donors.

## **Nickel sources**

Enrichment cultures contained ~2-10x more total dissolved Ni than the basal growth medium. The inoculum (~60 nM in Lake Matano deep water; Crowe et al., 2008b) would not have significantly contributed to the Ni pool past the 1° enrichment, and repeated needle exposure had

no effect on Ni concentrations. The Ni source to enrichment cultures was likely partial ferrihydrite dissolution, since ferrihydrite readily scavenges Ni from solution (Zegeye et al., 2012), while its dissolution liberates Ni (Table S1; Crowe et al., 2007b). Slow Ni leaching from silicate glass during extended contact between microbes and the serum bottles could have contributed another source of Ni in microbial enrichments vs. abiotic controls (Hausrath et al., 2007).

### **Geobiological implications**

Our results point to a mineralogical control on Fe(III) reduction, methanogenesis, and microbial community composition and diversity, under conditions of severe organic carbon limitation. These conditions likely existed in Archean and Paleoproterozoic oceans with relatively low amounts of primary production (Knoll et al., 2016; Farquhar et al., 2011). We posit that the relative abundance and distribution of Fe(III) phases in marine sediments would have impacted methanogenesis rates in the Archean and Paleoproterozoic. Sediments below shallow water columns were likely fed by abundant amorphous Fe(III) from photoferrotrophic activity, resulting in rapid sedimentation of amorphous Fe(III) phases (e.g. ferrihydrite). These Fe(III) oxides could have supported diverse Fe(III)-reducing communities that outcompeted other taxa such as methanogens for limited carbon and nutrients.

Conversely, slow deposition and aging of ferrihydrite to goethite could have limited both the abundance and diversity of Fe(III)-reducing microbes in sediments, allowing for more organic carbon remineralization via methanogenesis than Fe(III) reduction, as recently calculated for Lake Matano (Kuntz et al., 2015; Crowe et al., 2011). In the open ocean, organic carbon and Fe(III) would likely have been consumed before reaching sediments, leaving behind more

crystalline Fe(III) phases. Importantly, the role of Fe(III)-driven CH<sub>4</sub> oxidation appears limited given our experimental results, although we cannot rule out this pathway given that some of our data suggest it may operate at low rates.

Availability of trace metal nutrients is another important consideration in potential controls on ancient CH<sub>4</sub> and Fe cycling. Measurements of Ni/Fe ratios in ancient marine sediments indicate that total dissolved Ni decreased from ~400 nM before 2.7 Ga to 200 nM between 2.7-2.5 Ga, to modern levels of 2-11 nM at ~0.5 Ga, assuming that the Fe(III) minerals in Archean sediments were of biological origin (Konhauser et al., 2009; Eickhoff et al., 2014; Konhauser et al., 2015). It is likely that abundant Ni would have been bound and sequestered in Fe(III)-oxide rich sediments. Rapid and widespread Archean redox cycling of Fe(III) could have served as constant source of Ni for methanogenic communities. The influence of changing availability of Se (Stüeken et al., 2015) and other trace nutrients on methanogenesis rates through time remains open for further exploration.

Overall, our results support a model for a sustained CH<sub>4</sub> greenhouse in the Archean and Paleoproterozoic due to emissions from ferruginous oceans with spatially segregated habitats of bacterial reduction of reactive Fe(III) oxides and methanogenesis in the presence of less reactive Fe(III) phases. Rates of Fe(III) deposition, aging, and recrystallization may thus have played an important role in regulating the preservation of sedimentary Fe(III), the production of CH<sub>4</sub>, and the ecology and diversity of the biosphere during the first half of Earth history. By the mid-Proterozoic, rising seawater sulfate likely stimulated anaerobic CH<sub>4</sub> oxidation, thereby minimizing marine CH<sub>4</sub> emissions and the CH<sub>4</sub> greenhouse (Olson et al., 2016).

## Acknowledgements

This research was funded by NASA Exobiology grant NNX14AJ87G. Support was also provided by a Center for Dark Energy Biosphere Investigations (NSF-CDEBI OCE-0939564) small research grant, and supported by the NASA Astrobiology Institute (NNA15BB03A). SAC was supported through NSERC CRC, CFI, and Discovery grants. We thank Miles Mobley and Johnny Striepen for assistance with laboratory incubations, and Nadia Szeinbaum, Liz Percak-Dennett, Martial Tallefert, and Joel Kostka for helpful discussions.

## References

- Amos R, Bekins B, Cozzarelli I, Voytek M, Kirshtein J, Jones E, Blowes D (2012) Evidence for iron-mediated anaerobic methane oxidation in a crude oil-contaminated aquifer. *Geobiology*, **10**, 506-517.
- Battistuzzi FU, Feijao A, Hedges SB (2004) A genomic timescale of prokaryote evolution: insights into the origin of methanogenesis, phototrophy, and the colonization of land. *BMC Evolutionary Biology*, **4**, 44.
- Beal EJ, House CH, Orphan VJ (2009) Manganese- and iron-dependent marine methane oxidation. *Science*, **325**, 184-187.
- Brandes JA (2009) Rapid and precise  $\delta^{13}\text{C}$  measurement of dissolved inorganic carbon in natural waters using liquid chromatography coupled to an isotope-ratio mass spectrometer. *Limnology and Oceanography: Methods*, **7**, 730-739.
- Caldwell SL, Laidler JR, Brewer EA, Eberly JO, Sandborgh SC, Colwell FS (2008) Anaerobic oxidation of methane: mechanisms, bioenergetics, and the ecology of associated microorganisms. *Environmental Science & Technology*, **42**, 6791-6799.
- Caporaso JG, Lauber CL, Walters WA, Berg-Lyons D, Lozupone CA, Turnbaugh PJ, Fierer N, Knight R (2011) Global patterns of 16S rRNA diversity at a depth of millions of sequences per sample. *Proceedings of the National Academy of Sciences*, **108**, 4516-4522.
- Converse BJ, McKinley JP, Resch CT, Roden EE (2015) Microbial mineral colonization across a subsurface redox transition zone. *Frontiers in microbiology*, **6**.
- Craddock PR, Dauphas N (2011) Iron and carbon isotope evidence for microbial iron respiration throughout the Archean. *Earth and Planetary Science Letters*, **303**, 121-132.
- Crowe S, Katsev S, Leslie K, Sturm A, Magen C, Nomosatryo S, Pack M, Kessler J, Reeburgh W, Roberts J (2011) The methane cycle in ferruginous Lake Matano. *Geobiology*, **9**, 61-78.
- Crowe S, Roberts J, Weisener C, Fowle D (2007a) Alteration of iron-rich lacustrine sediments by dissimilatory iron-reducing bacteria. *Geobiology*, **5**, 63-73.
- Crowe SA, Jones C, Katsev S, Magen CD, O'Neill AH, Sturm A, Canfield DE, Haffner GD, Mucci A, Sundby BR (2008a) Photoferrotrophs thrive in an Archean Ocean analogue. *Proceedings of the National Academy of Sciences*, **105**, 15938-15943.
- Crowe SA, O'Neill AH, Katsev S, Hehanussa P, Haffner GD, Sundby B, Mucci A, Fowle DA (2008b) The biogeochemistry of tropical lakes: A case study from Lake Matano, Indonesia. *Limnology Oceanography*, **53**, 319-331.

515 Crowe SA, O'Neill AH, Kulczycki E, Weisener CG, Roberts JA, Fowle DA (2007b) Reductive  
516 dissolution of trace metals from sediments. *Geomicrobiology Journal*, **24**, 157-165.

517 Edgar RC, Haas BJ, Clemente JC, Quince C, Knight R (2011) UCHIME improves sensitivity  
518 and speed of chimera detection. *Bioinformatics*, **27**, 2194-2200.

519 Egger M, Rasigraf O, Sapart CLJ, Jilbert T, Jetten MS, Röckmann T, Van Der Veen C, Bână  
520 N, Kartal B, Ettwig KF (2015) Iron-mediated anaerobic oxidation of methane in brackish  
521 coastal sediments. *Environmental Science & Technology*, **49**, 277-283.

522 Eickhoff M, Obst M, Schröder C, Hitchcock AP, Tyliszczak T, Martinez RE, Robbins LJ,  
523 Konhauser KO, Kappler A (2014) Nickel partitioning in biogenic and abiogenic  
524 ferrihydrite: the influence of silica and implications for ancient environments. *Geochim.*  
525 *Cosmochim. Acta*, **140**, 65-79.

526 Ettwig KF, Zhu B, Speth D, Keltjens JT, Jetten MSM, Kartal B (2016) Archaea catalyze iron-  
527 dependent anaerobic oxidation of methane. *Proceedings of the National Academy of*  
528 *Sciences*, **113**, 12792-12796.

529 Farquhar J, Zerkle AL, Bekker A (2011) Geological constraints on the origin of oxygenic  
530 photosynthesis. *Photosynthesis Research*, **107**, 11-36.

531 Fournier GP, Gogarten JP (2008) Evolution of acetoclastic methanogenesis in *Methanosarcina*  
532 via horizontal gene transfer from cellulolytic *Clostridia*. *Journal of Bacteriology*, **190**,  
533 1124-1127.

534 Fu L, Li S-W, Ding Z-W, Ding J, Lu Y-Z, Zeng RJ (2016) Iron reduction in the  
535 DAMO/*Shewanella oneidensis* MR-1 coculture system and the fate of Fe(II). *Water*  
536 *Research*, **88**, 808-815.

537 Gal'chenko V (2004) On the problem of anaerobic methane oxidation. *Microbiology*, **73**, 599-  
538 608.

539 Hansel CM, Benner SG, Neiss J, Dohnalkova A, Kukkadapu RK, Fendorf S (2003) Secondary  
540 mineralization pathways induced by dissimilatory iron reduction of ferrihydrite under  
541 advective flow. *Geochimica et Cosmochimica Acta*, **67**, 2977-2992.

542 Hansen JW, Thamdrup B, Jørgensen BB (2000) Anoxic incubation of sediment in gas-tight  
543 plastic bags: a method for biogeochemical process studies. *Marine Ecology Progress*  
544 *Series*, **208**, 273-282.

545 Haqq-Misra JD, Domagal-Goldman SD, Kasting PJ, Kasting JF (2008) A revised, hazy methane  
546 greenhouse for the Archean Earth. *Astrobiology*, **8**, 1127-1137.

547 Hausrath EM, Liermann LJ, House CH, Ferry JG, Brantley SL (2007) The effect of methanogen  
548 growth on mineral substrates: will Ni markers of methanogen based communities be  
549 detectable in the rock record? *Geobiology*, **5**, 49-61.



550 Hori T, Müller A, Igarashi Y, Conrad R, Friedrich MW (2010) Identification of iron-reducing  
551 microorganisms in anoxic rice paddy soil by <sup>13</sup>C-acetate probing. *The ISME journal*, **4**,  
552 267-278.

553 Jensen MM, Thamdrup B, Rysgaard S, Holmer M, Fossing H (2003) Rates and regulation of  
554 microbial iron reduction in sediments of the Baltic-North Sea transition.  
555 *Biogeochemistry*, **65**, 295-317.

556 Johnson CM, Beard BL, Roden EE (2008) The iron isotope fingerprints of redox and  
557 biogeochemical cycling in modern and ancient Earth. *Annual Reviews of Earth and*  
558 *Planetary Sciences*, **36**, 457-493.

559 Kappler A, Pasquero C, Konhauser KO, Newman DK (2005) Deposition of banded iron  
560 formations by anoxygenic phototrophic Fe(II)-oxidizing bacteria. *Geology*, **33**, 865-868.

561 Kashefi K, Holmes DE, Baross JA, Lovley DR (2003) Thermophily in the Geobacteraceae:  
562 *Geothermobacter ehrlichii* gen. nov., sp. nov., a Novel Thermophilic Member of the  
563 Geobacteraceae from the “Bag City” Hydrothermal Vent. *Applied and Environmental*  
564 *Microbiology*, **69**, 2985-2993.

565 Kasting JF (2005) Methane and climate during the Precambrian era. *Precambrian Research* **137**,  
566 119-129.

567 Knoll AH, Bergmann KD, Strauss JV (2016) Life: the first two billion years. *Phil. Trans. R. Soc.*  
568 *B*, **371**, 20150493.

569 Konhauser K, Newman D, Kappler A (2005) The potential significance of microbial Fe(III)  
570 reduction during deposition of Precambrian banded iron formations. *Geobiology*, **3**, 167-  
571 177.

572 Konhauser KO, Pecoits E, Lalonde SV, Papineau D, Nisbet EG, Barley ME, Arndt NT, Zahnle  
573 K, Kamber BS (2009) Oceanic nickel depletion and a methanogen famine before the  
574 Great Oxidation Event. *Nature*, **458**, 750-753.

575 Konhauser KO, Robbins LJ, Pecoits E, Peacock C, Kappler A, Lalonde SV (2015) The Archean  
576 nickel famine revisited. *Astrobiology*, **15**, 804-815.

577 Kostka JE, Luther GW (1994) Partitioning and speciation of solid phase iron in saltmarsh  
578 sediments. *Geochimica Cosmochimica Acta*, **58**, 1701-1710.

579 Kostka JE, Roychoudhury A, Van Cappellen P (2002) Rates and controls of anaerobic microbial  
580 respiration across spatial and temporal gradients in saltmarsh sediments.  
581 *Biogeochemistry*, **60**, 49-76.

582 Kozich JJ, Westcott SL, Baxter NT, Highlander SK, Schloss PD (2013) Development of a dual-  
583 index sequencing strategy and curation pipeline for analyzing amplicon sequence data on  
584 the MiSeq Illumina sequencing platform. *Applied and Environmental Microbiology*, **79**,  
585 5112-5120.

586 Kuntz LB, Laakso TA, Schrag DP, Crowe SA (2015) Modeling the carbon cycle in Lake  
587 Matano. *Geobiology*, **13**, 454-461.

588 Lovley D, Phillips E (1986) Organic matter mineralization with reduction of ferric iron in  
589 anaerobic sediments. *Applied and Environmental Microbiology*, **51**, 683-689.

590 Lovley DR, Goodwin S (1988) Hydrogen concentrations as an indicator of the predominant  
591 terminal electron-accepting reactions in aquatic sediments. *Geochimica et Cosmochimica*  
592 *Acta*, **52**, 2993-3003.

593 Lovley DR, Phillips EJ (1987) Competitive mechanisms for inhibition of sulfate reduction and  
594 methane production in the zone of ferric iron reduction in sediments. *Applied and*  
595 *Environmental Microbiology*, **53**, 2636-2641.

596 Niemann H, Steinle L, Bles J, Bussmann I, Treude T, Krause S, Elvert M, Lehmann MF (2015)  
597 Toxic effects of lab-grade butyl rubber stoppers on aerobic methane oxidation. *Limnology*  
598 *and Oceanography: Methods*, **13**, 40-52.

599 Noroi KA, Thamdrup B, Schubert CJ (2013) Anaerobic oxidation of methane in an iron-rich  
600 Danish freshwater lake sediment. *Limnology and Oceanography*, **58**, 546-554.

601 Olson SL, Reinhard CT, Lyons TW (2016) Limited role for methane in the mid-Proterozoic  
602 greenhouse. *PNAS*, **113**, 11447-11452.

603 Pavlov AA, Kasting JF, Brown LL, Rages KA, Freedman R (2000) Greenhouse warming by  
604 CH<sub>4</sub> in the atmosphere of early Earth. *Journal of Geophysical Research: Planets*, **105**,  
605 11981-11990.

606 Poulton SW, Canfield DE (2005) Development of a sequential extraction procedure for iron:  
607 implications for iron partitioning in continentally derived particulates. *Chemical Geology*,  
608 **214**, 209-221.

609 Poulton SW, Canfield DE (2011) Ferruginous conditions: a dominant feature of the ocean  
610 through Earth's history. *Elements*, **7**, 107-112.

611 Reinhold-Hurek B, Hurek T (2015) Azospira. *Bergey's Manual of Systematics of Archaea and*  
612 *Bacteria*, **1-3**.

613 Riedinger N, Formolo M, Lyons T, Henkel S, Beck A, Kasten S (2014) An inorganic  
614 geochemical argument for coupled anaerobic oxidation of methane and iron reduction in  
615 marine sediments. *Geobiology*, **12**, 172-181.

616 Roberson AL, Roadt J, Halevy I, Kasting J (2011) Greenhouse warming by nitrous oxide and  
617 methane in the Proterozoic Eon. *Geobiology*, **9**, 313-320.

618 Roden EE, Wetzel RG (1996) Organic carbon oxidation and suppression of methane production  
619 by microbial Fe (III) oxide reduction in vegetated and unvegetated freshwater wetland  
620 sediments. *Limnology and Oceanography*, **41**, 1733-1748.

- 621 Roden EE, Wetzel RG (2002) Kinetics of microbial Fe (III) oxide reduction in freshwater  
622 wetland sediments. *Limnology and Oceanography*, **47**, 198-211.
- 623 Rooze J, Egger M, Tsandev I, Slomp CP (2016) Iron-dependent anaerobic oxidation of methane  
624 in coastal surface sediments: Potential controls and impact. *Limnology and*  
625 *Oceanography*.
- 626 Rotaru A-E, Shrestha PM, Liu F, Shrestha M, Shrestha D, Embree M, Zengler K, Wardman C,  
627 Nevina KP, Lovley DR (2014) A new model for electron flow during anaerobic  
628 digestion: direct interspecies electron transfer to Methanosaeta for the reduction of  
629 carbon dioxide to methane. *Energy & Environmental Science*, **7**, 408-415.
- 630 Scheller S, Yi H, Chadwick GL, Mcglynn SE, Orphan VJ (2016) Artificial electron acceptors  
631 decouple archaeal methane oxidation from sulfate reduction. *Science*, **351**, 703-707.
- 632 Schloss PD, Westcott SL, Ryabin T, Hall JR, Hartmann M, Hollister EB, Lesniewski RA,  
633 Oakley BB, Parks DH, Robinson CJ (2009) Introducing mothur: open-source, platform-  
634 independent, community-supported software for describing and comparing microbial  
635 communities. *Applied and environmental microbiology*, **75**, 7537-7541.
- 636 Segarra KEA, Comerford C, Slaughter J, Joye SB (2013) Impact of electron acceptor availability  
637 on the anaerobic oxidation of methane in coastal freshwater and brackish wetland  
638 sediments. *Geochimica et Cosmochimica Acta*, **115**, 15-30.
- 639 Sivan O, Adler M, Pearson A, Gelman F, Bar-Or I, John SG, Eckert W (2011) Geochemical  
640 evidence for iron-mediated anaerobic oxidation of methane. *Limnology and*  
641 *Oceanography*, **56**, 1536-1544.
- 642 Sivan O, Antler G, Turchyn AV, Marlow JJ, Orphan VJ (2014) Iron oxides stimulate sulfate-  
643 driven anaerobic methane oxidation in seeps. *Proceedings of the National Academy of*  
644 *Sciences*, **111**, 4139-4147.
- 645 Stolz JF, Ellis DJ, Blum JS, Ahmann D, Lovley DR, Oremland RS (1999) Note: Sulfurospirillum  
646 barnesii sp. nov. and Sulfurospirillum arsenophilum sp. nov., new members of the  
647 Sulfurospirillum clade of the  $\epsilon$ -Proteobacteria. *International Journal of Systematic and*  
648 *Evolutionary Microbiology*, **49**, 1177-1180.
- 649 Stookey LL (1970) Ferrozine---a new spectrophotometric reagent for iron. *Analytical Chemistry*,  
650 **42**, 779-781.
- 651 Stüeken EE, Buick R, Anbar AD (2015) Selenium isotopes support free O<sub>2</sub> in the latest Archean.  
652 *Geology*, **43**, 259-262.
- 653 Sturm A, Fowle DA, Jones C, Leslie KL, Nomosatryo S, Henny C, Canfield DE, Crowe S  
654 (2015) Rates and pathways of methane oxidation in ferruginous Lake Matano, Indonesia.  
655 *Biogeosciences Discussions*, **12**, 1-34.

656 Ueno Y, Yamada K, Yoshida N, Maruyama S, Isozaki Y (2006) Evidence from fluid inclusions  
657 for microbial methanogenesis in the early Archaean era. *Nature*, **440**, 516-519.

658 Vargas M, Kashefi K, Blunt-Harris EL, Lovley DR (1998) Microbiological evidence for Fe(III)  
659 reduction on early Earth. *Nature*, **395**, 65-67.

660 Willems A (2014) The family Comamonadaceae. In: *The Prokaryotes*. Springer, pp. 777-851.

661 Zavarzina DG, Sokolova TG, Tourova TP, Chernyh NA, Kostrikina NA, Bonch-Osmolovskaya  
662 EA (2007) *Thermincola ferriacetica* sp. nov., a new anaerobic, thermophilic, facultatively  
663 chemolithoautotrophic bacterium capable of dissimilatory Fe(III) reduction.  
664 *Extremophiles*, **11**, 1-7.

665 Zegeye A, Bonneville S, Benning LG, Sturm A, Fowle DA, Jones C, Canfield DE, Ruby C,  
666 Maclean LC, Nomosatryo S (2012) Green rust formation controls nutrient availability in  
667 a ferruginous water column. *Geology*, **40**, 599-602.

668 Zehnder AJ, Brock TD (1979) Methane formation and methane oxidation by methanogenic  
669 bacteria. *Journal of Bacteriology*, **137**, 420-432.

670 Zehnder AJ, Brock TD (1980) Anaerobic methane oxidation: occurrence and ecology. *Applied*  
671 *and Environmental Microbiology*, **39**, 194-204.

672 Zhou S, Xu J, Yang G, Zhuang L (2014) Methanogenesis affected by the co-occurrence of iron  
673 (III) oxides and humic substances. *FEMS Microbiology Ecology*, **88**, 107-120.

674

675

# Figure Captions

**Figure 1. HCl-extractable  $\text{Fe}^{2+}$  for sediment enrichments with (a) ferrihydrite and (b) goethite over 497 days.** Timeline at top shows transfer dates and dilution ratios. “A” represents days that controls were autoclaved. Red and black symbols represent treatments with and without  $\text{CH}_4$ , respectively. White symbols represent autoclaved controls. All treatments were run in duplicate (circle and triangle symbols). Photos depict 2° and 3° enrichment bottles on day 497 with evidence for magnetic mineral formation in live treatments amended with ferrihydrite.

**Figure 2. Accumulation of  $\text{CH}_4$  in the headspace of sediment enrichments.** Timeline at top shows transfer dates and dilution ratios. Solid and dotted lines represent ferrihydrite and goethite treatments, respectively. All treatments were run in duplicate (circle and triangle symbols). Original headspace was 100%  $\text{N}_2$ .

**Figure 3. Dissolved inorganic carbon (DIC) isotopic composition and concentration for sediment enrichments amended with  $^{13}\text{CH}_4$  and either (a,c) ferrihydrite or (b,d) goethite.** Timeline at top shows transfer dates and dilution ratios. “A” represents days that controls were autoclaved. Red and white symbols represent live treatments and autoclaved controls, respectively. Errors bars represent standard deviation of triplicate measurements. Calculated methane oxidation rates for the 1° enrichment were 1.7 and 1.1  $\mu\text{M CH}_4 \text{ d}^{-1}$  ferrihydrite bottles 1 and 2, respectively and 0.2 and 0.8  $\mu\text{M CH}_4 \text{ d}^{-1}$  for goethite bottles 1 and 2, respectively. Isotopic data are not plotted for DIC concentrations 0.5 mM. Rate calculations were not possible for the 2° enrichment due to low/variable DIC.

**Figure 4. 16S rRNA gene diversity and phylogenetic diversity for inoculum and sediment enrichments amended with (a) ferrihydrite and (b) goethite.** Samples were taken on day 15

(1° enrichment), 72 (2° enrichment) and 469 (3° enrichment). Red and black symbols represent treatments with and without CH<sub>4</sub>, respectively. Gray diamonds represent inoculum samples. All treatments were run in duplicate (circle and triangle symbols). Species richness, phylogenetic diversity, and species evenness for the sediment inoculum and enrichments normalized to 4000 sequences per sample are shown to the right of bar charts.

**Figure S1. Accumulation of CH<sub>4</sub> in the headspace during the 4° enrichment (days 571-663).**

All treatments were run in duplicate (circle and triangle symbols). The arrow represents addition of 1 μM Ni and Se on day 619. Original headspace was 100% N<sub>2</sub> (black symbols) or 80 N<sub>2</sub> / 20% H<sub>2</sub> (blue symbols). White symbols represent autoclaved controls. Solid and dashed lines represent goethite and no Fe(III) treatments, respectively.

**Table S1. Total dissolved Ni (nM) in basal media with and without Fe(III) oxides.** Samples were prepared in the same manner as enrichment cultures. A subset of samples was acidified in HNO<sub>3</sub> prior to filtering and measurement. Error is reported as the standard deviation of triplicate measurements. “n.d.” indicates not detectable.

| Number of needle exposures | Medium  | Medium +10 mM ferrihydrite | Medium +10 mM goethite | Medium +10 mM ferrihydrite + HNO <sub>3</sub> | Medium +10 mM goethite + HNO <sub>3</sub> |
|----------------------------|---------|----------------------------|------------------------|-----------------------------------------------|-------------------------------------------|
| 1                          | 41 ± 20 | 32 ± 1                     | 50 ± 36                | 2365                                          | 65*                                       |
| 2                          | 44 ± 13 | 33 ± 11                    | 52 ± 31                | n.d.                                          | n.d.                                      |
| 4                          | 39 ± 9  | 30 ± 17                    | 33 ± 10                | n.d.                                          | n.d.                                      |
| 6                          | 41 ± 18 | 22 ± 19                    | 33 ± 15                | 2385                                          | 605                                       |
| 8                          | 41 ± 12 | 40 ± 19                    | 42 ± 23                | n.d.                                          | n.d.                                      |
| 10                         | 46 ± 16 | 38 ± 27                    | 35 ± 4                 | n.d.                                          | n.d.                                      |

\*Counts for this measurement were below detection limit of the instrument.

715 **Table S2. Total dissolved Ni (nM) in 2° and 3° enrichment cultures.**

| Treatment    |                    | Enrichment |     |
|--------------|--------------------|------------|-----|
|              |                    | 2°         | 3°  |
| Ferrihydrite | CH <sub>4</sub> -1 | 130        | 241 |
|              | CH <sub>4</sub> -2 | 150        | 118 |
|              | N <sub>2</sub> -1  | 202        | 96  |
|              | N <sub>2</sub> -2  | 286        | 254 |
| Goethite     | CH <sub>4</sub> -1 | 104        | 101 |
|              | CH <sub>4</sub> -2 | 56         | 117 |
|              | N <sub>2</sub> -1  | 53         | 134 |
|              | N <sub>2</sub> -2  | 54         | 90  |

716

717



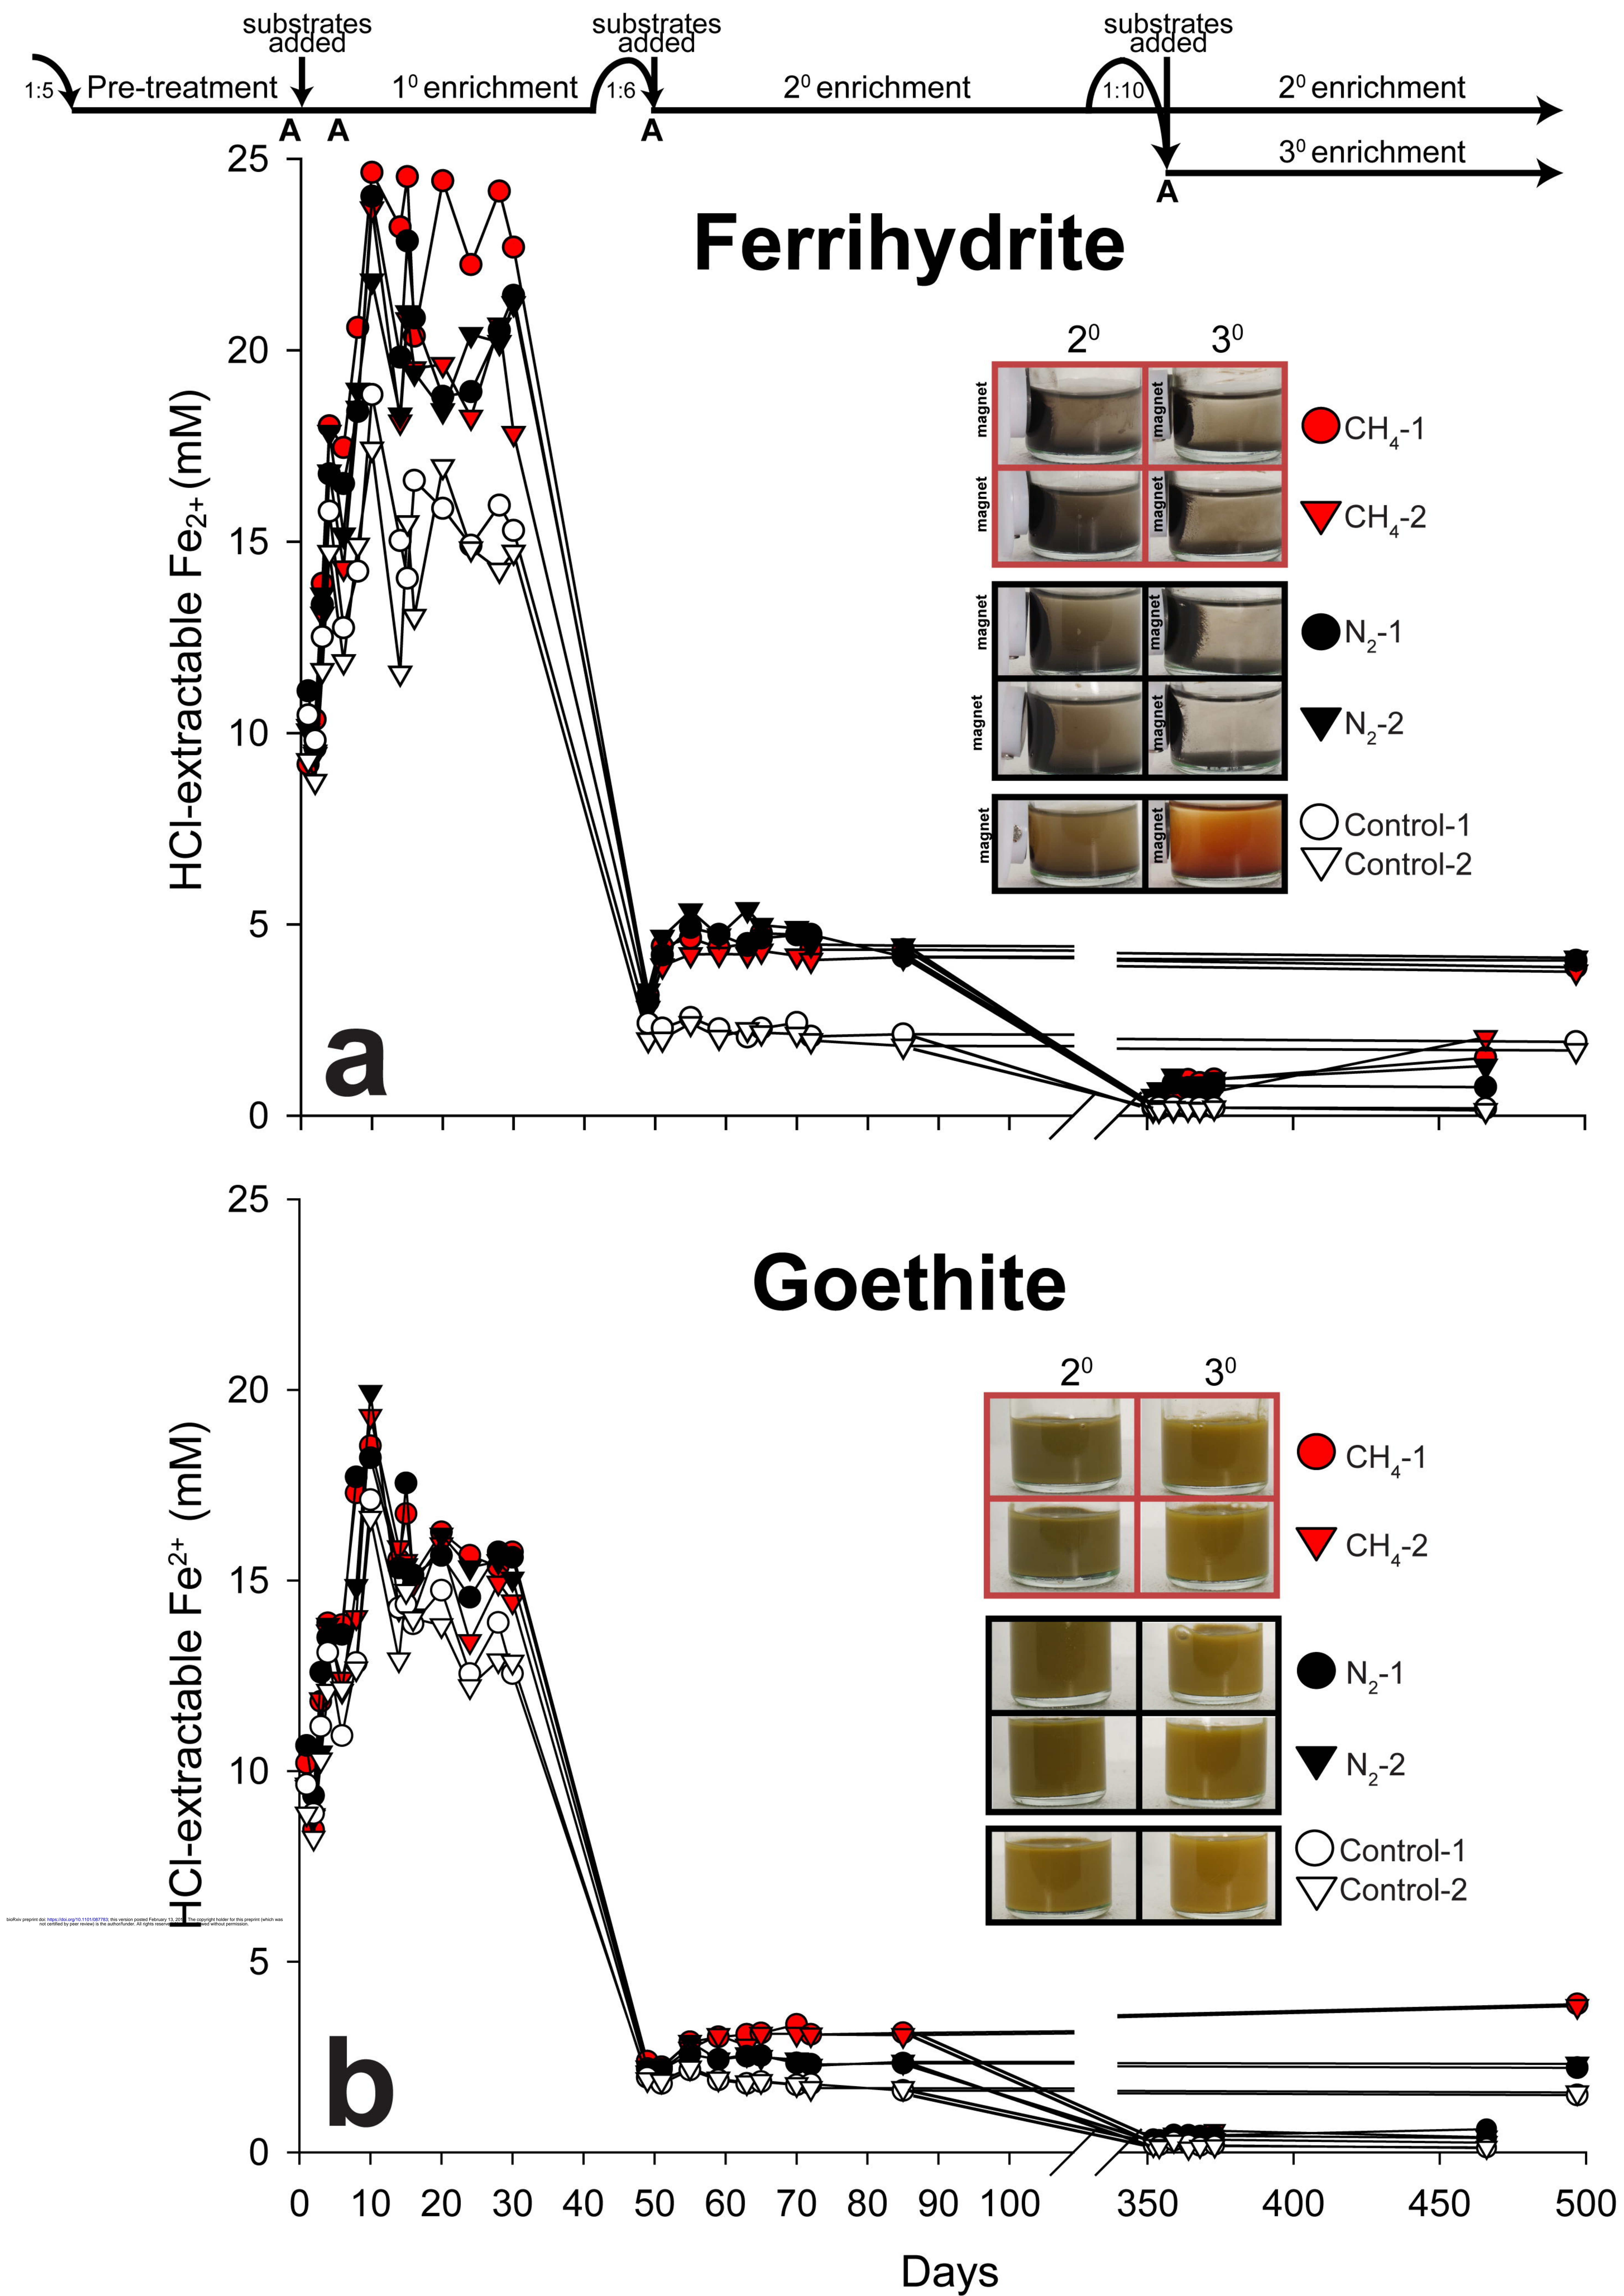



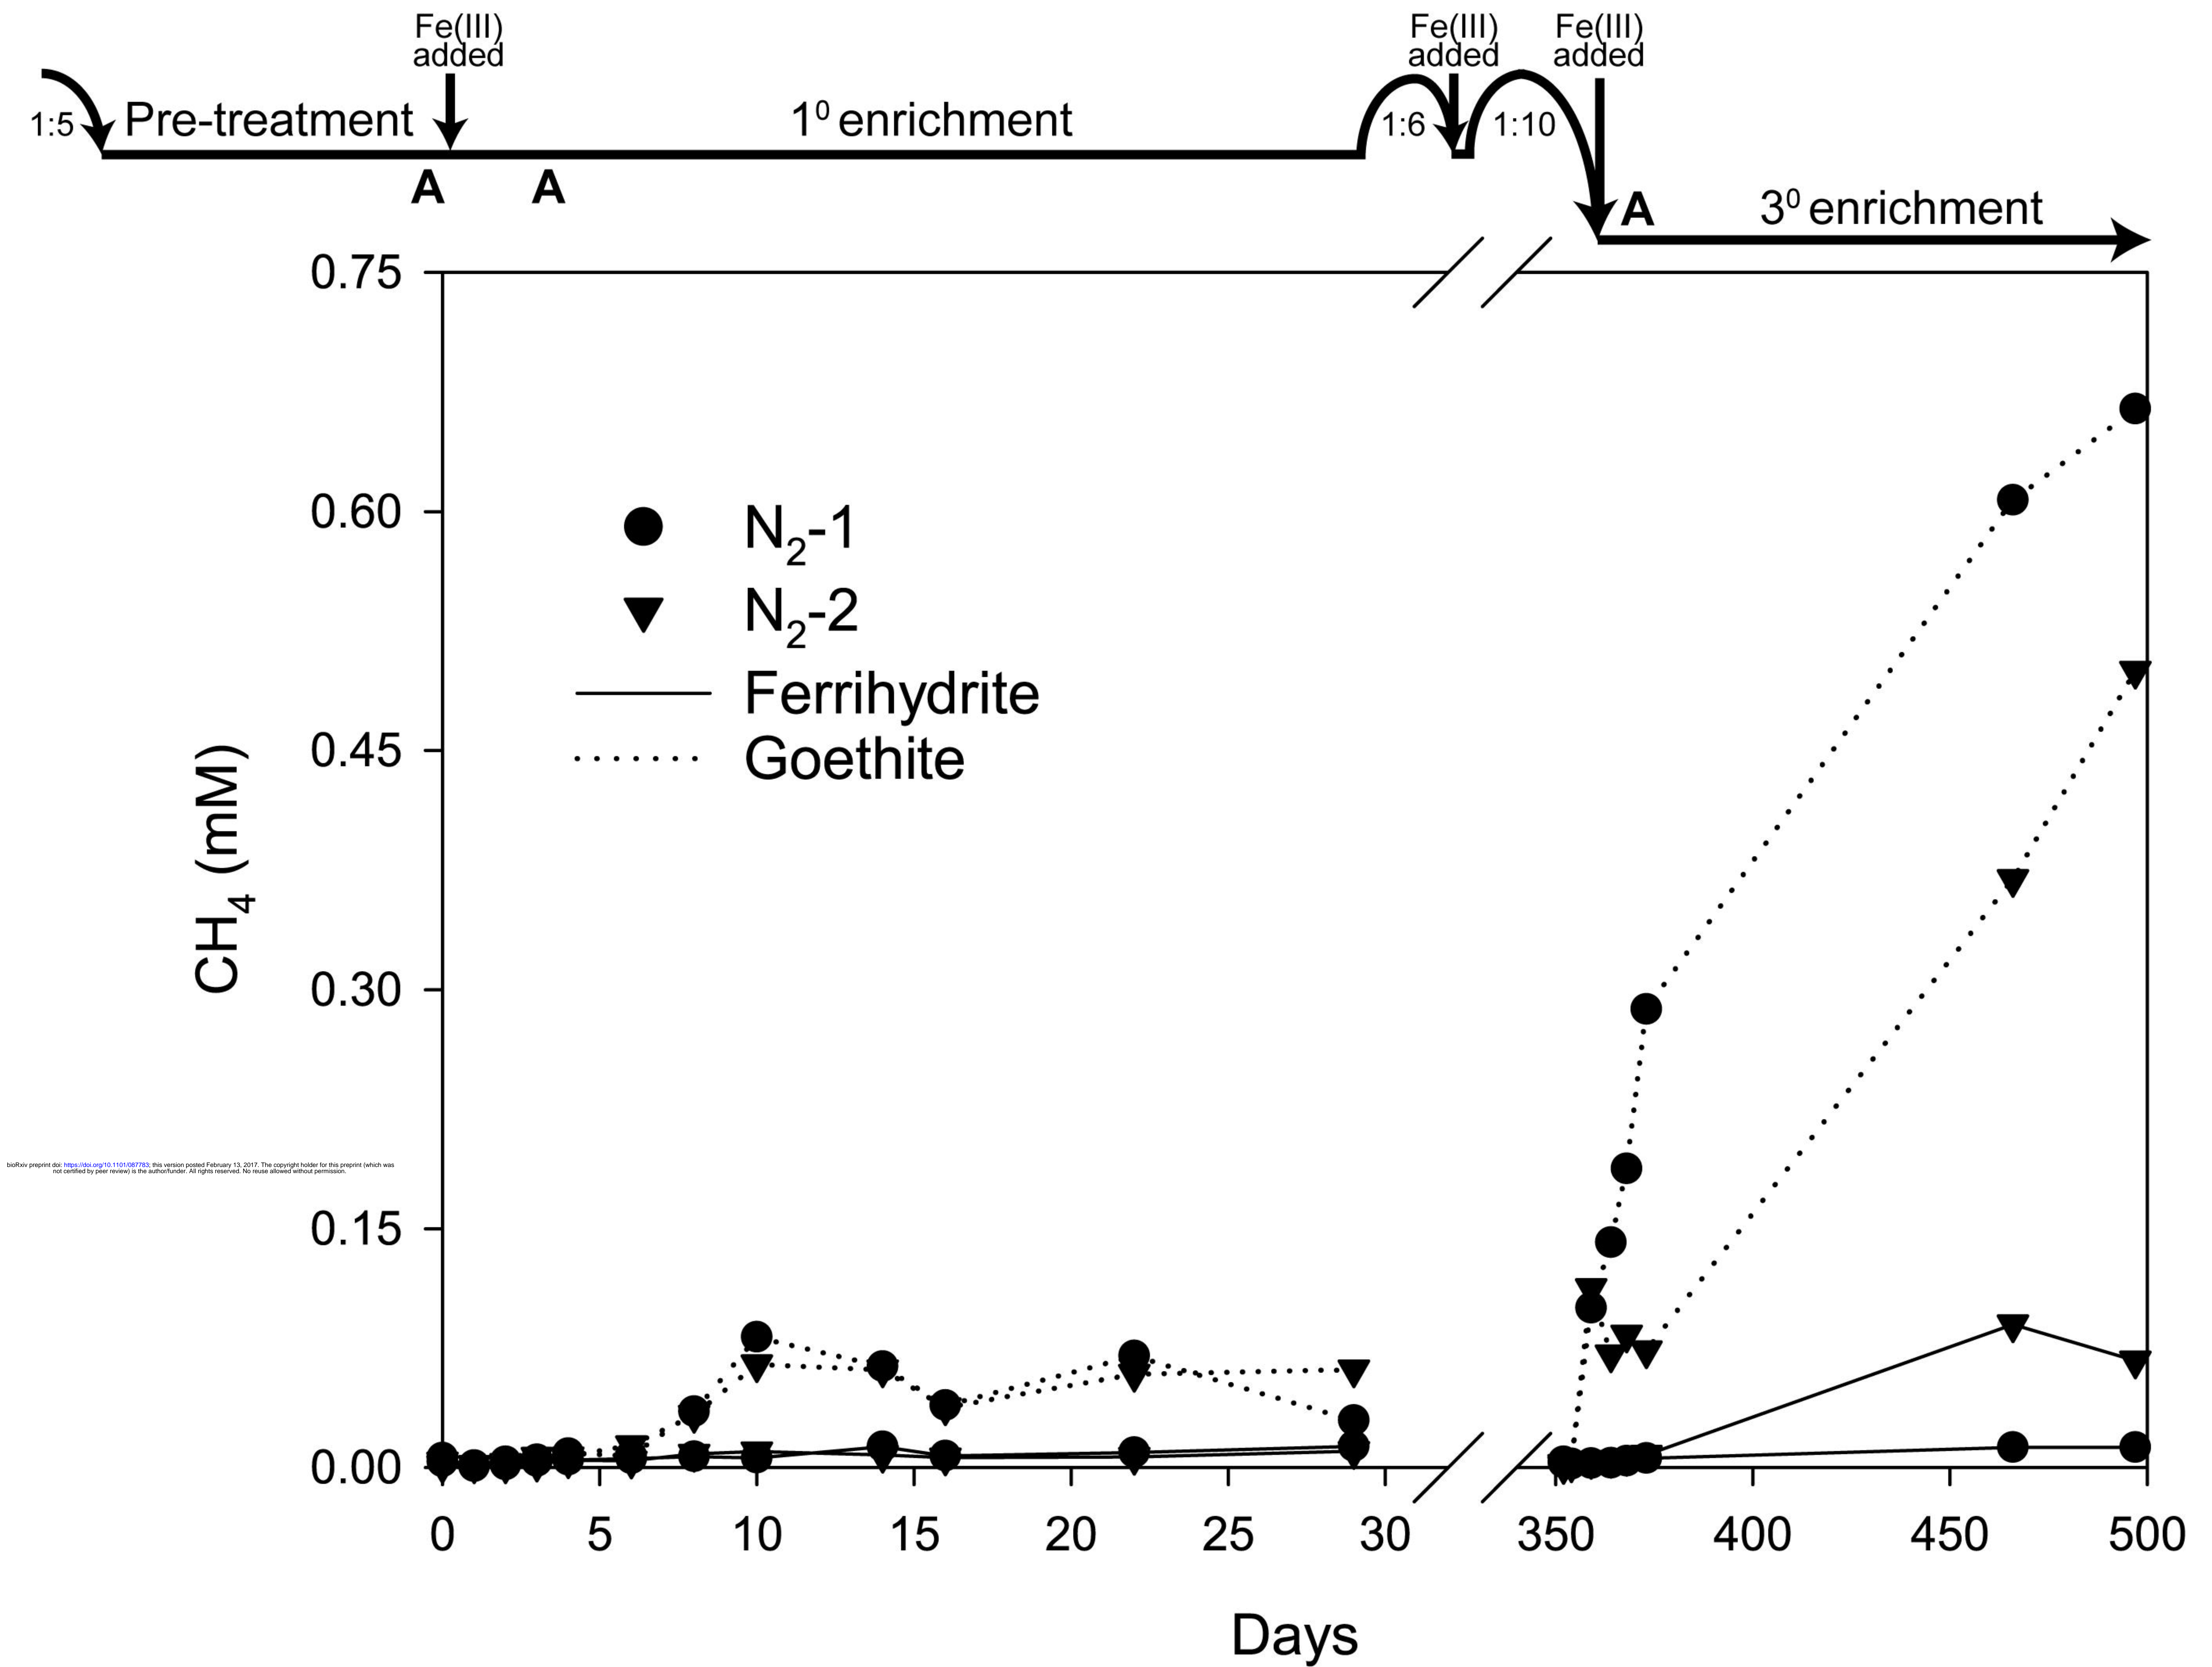



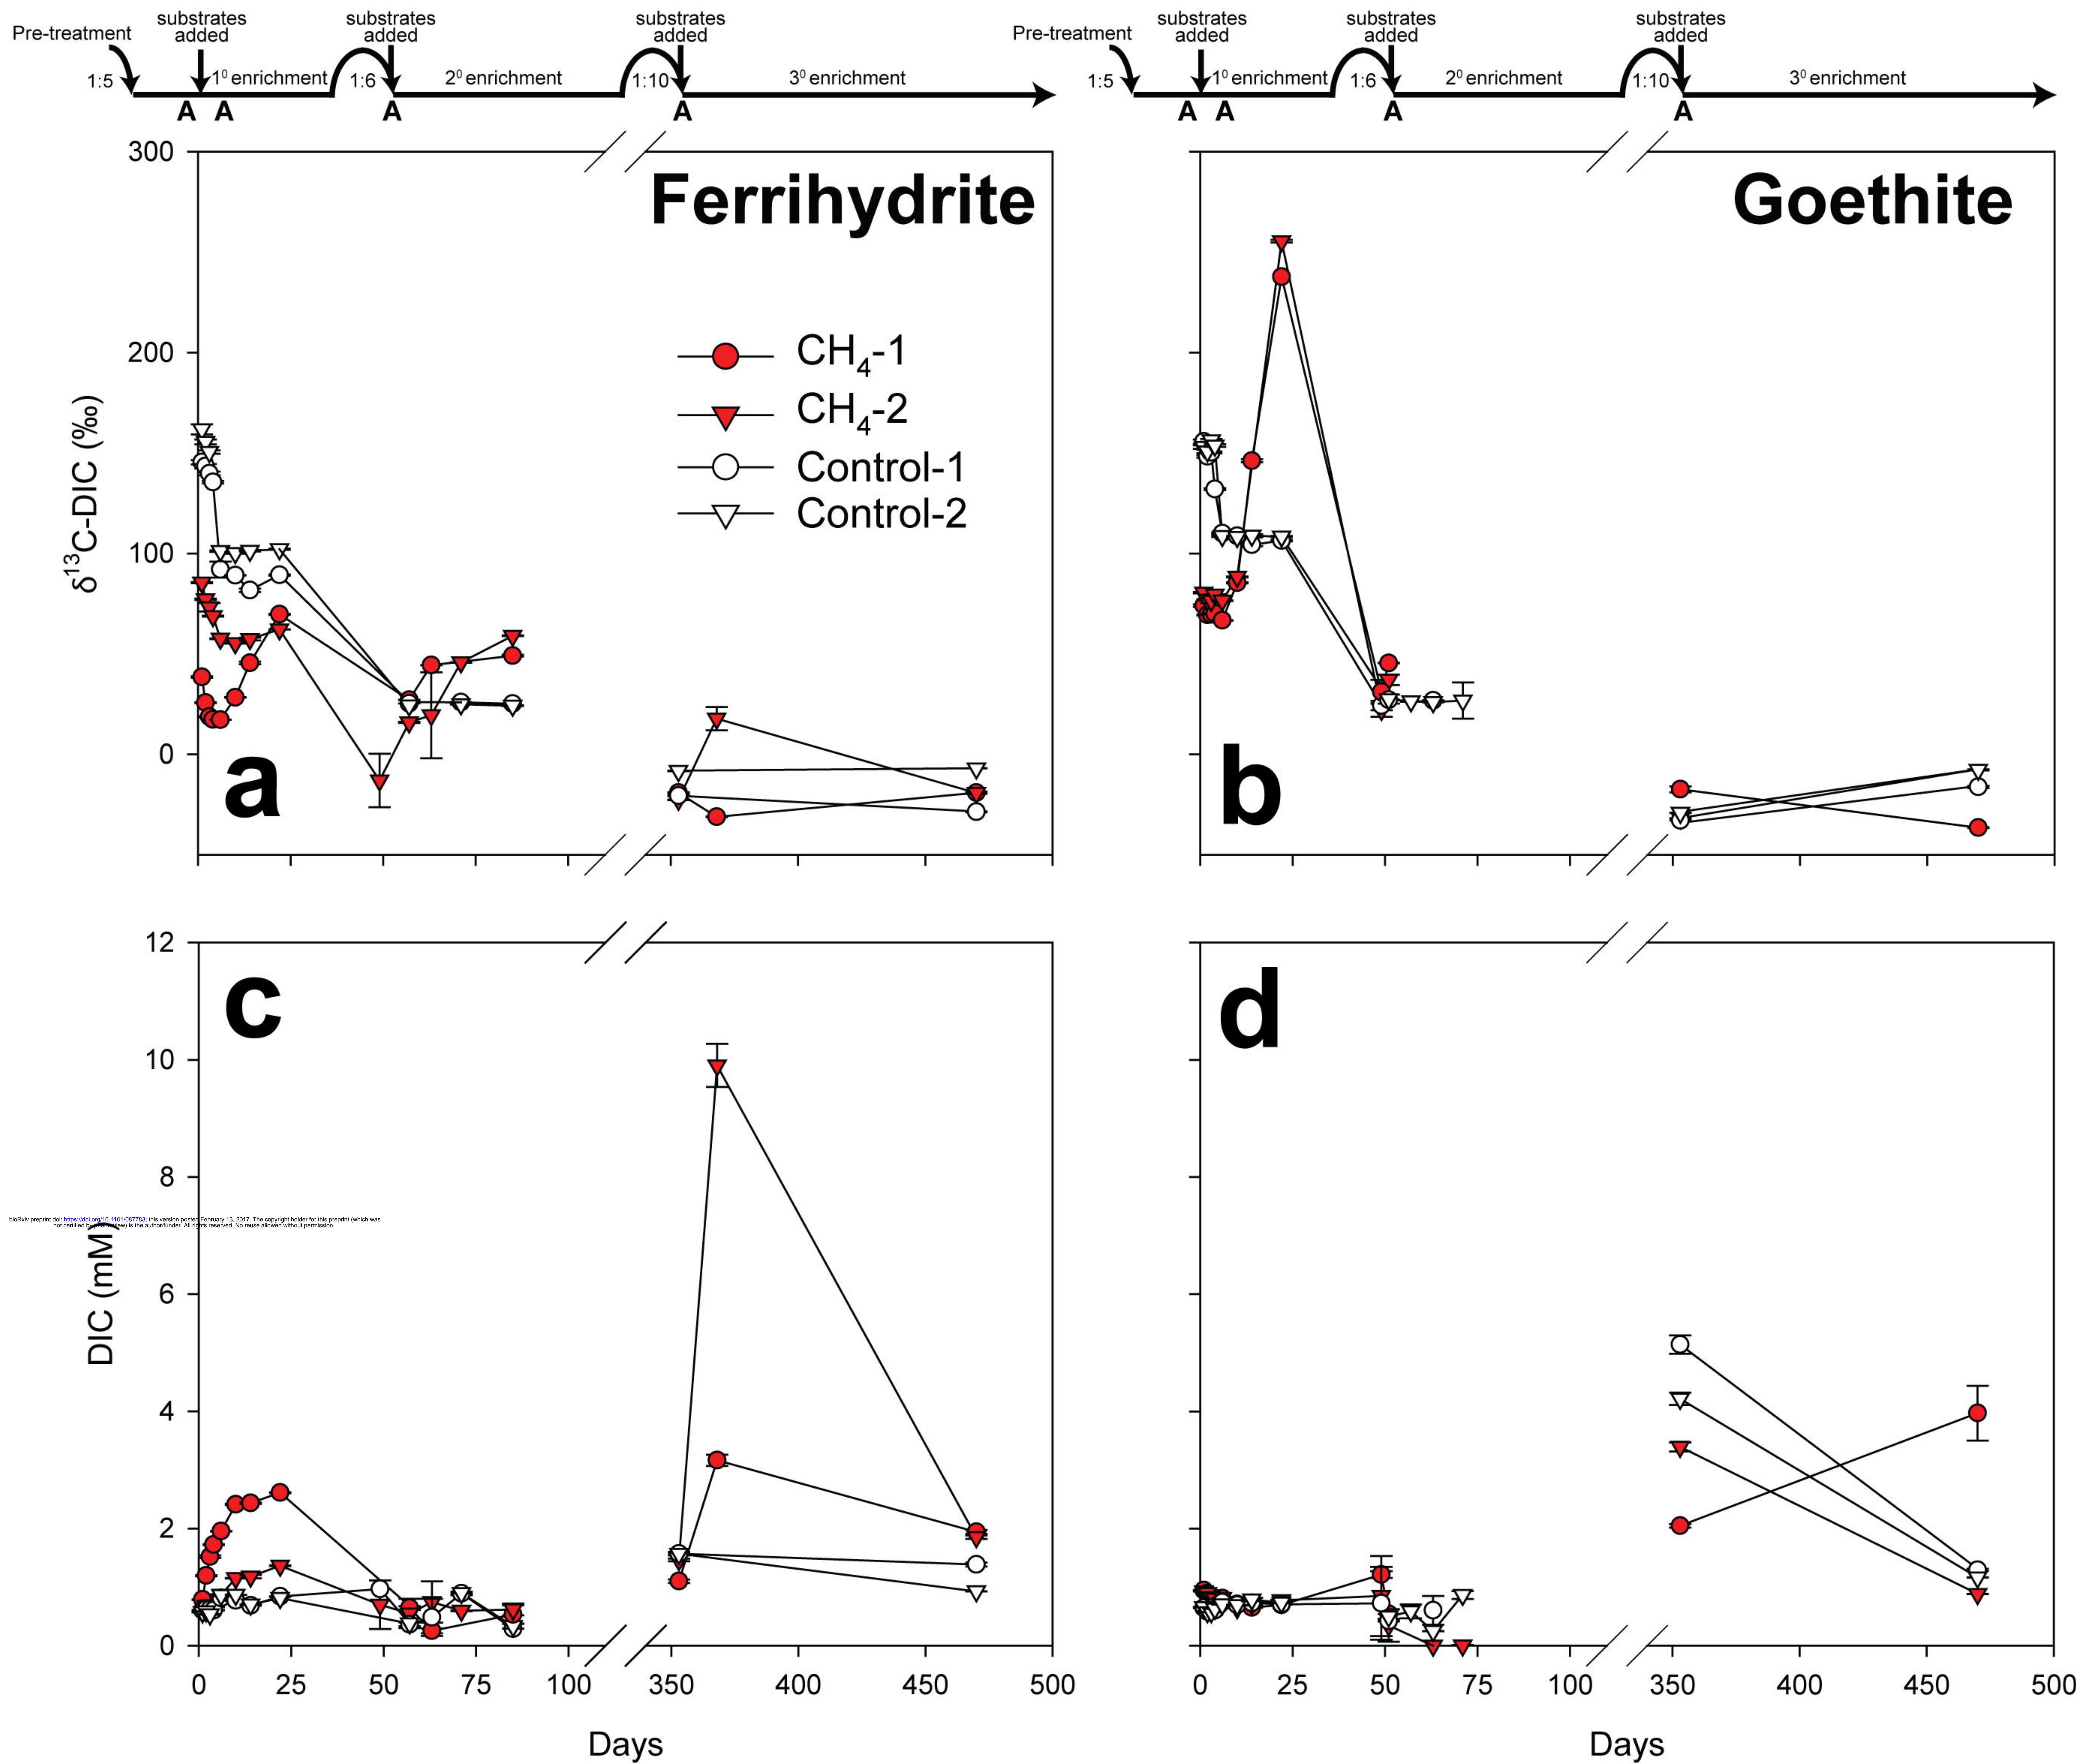



Ferrihydrite

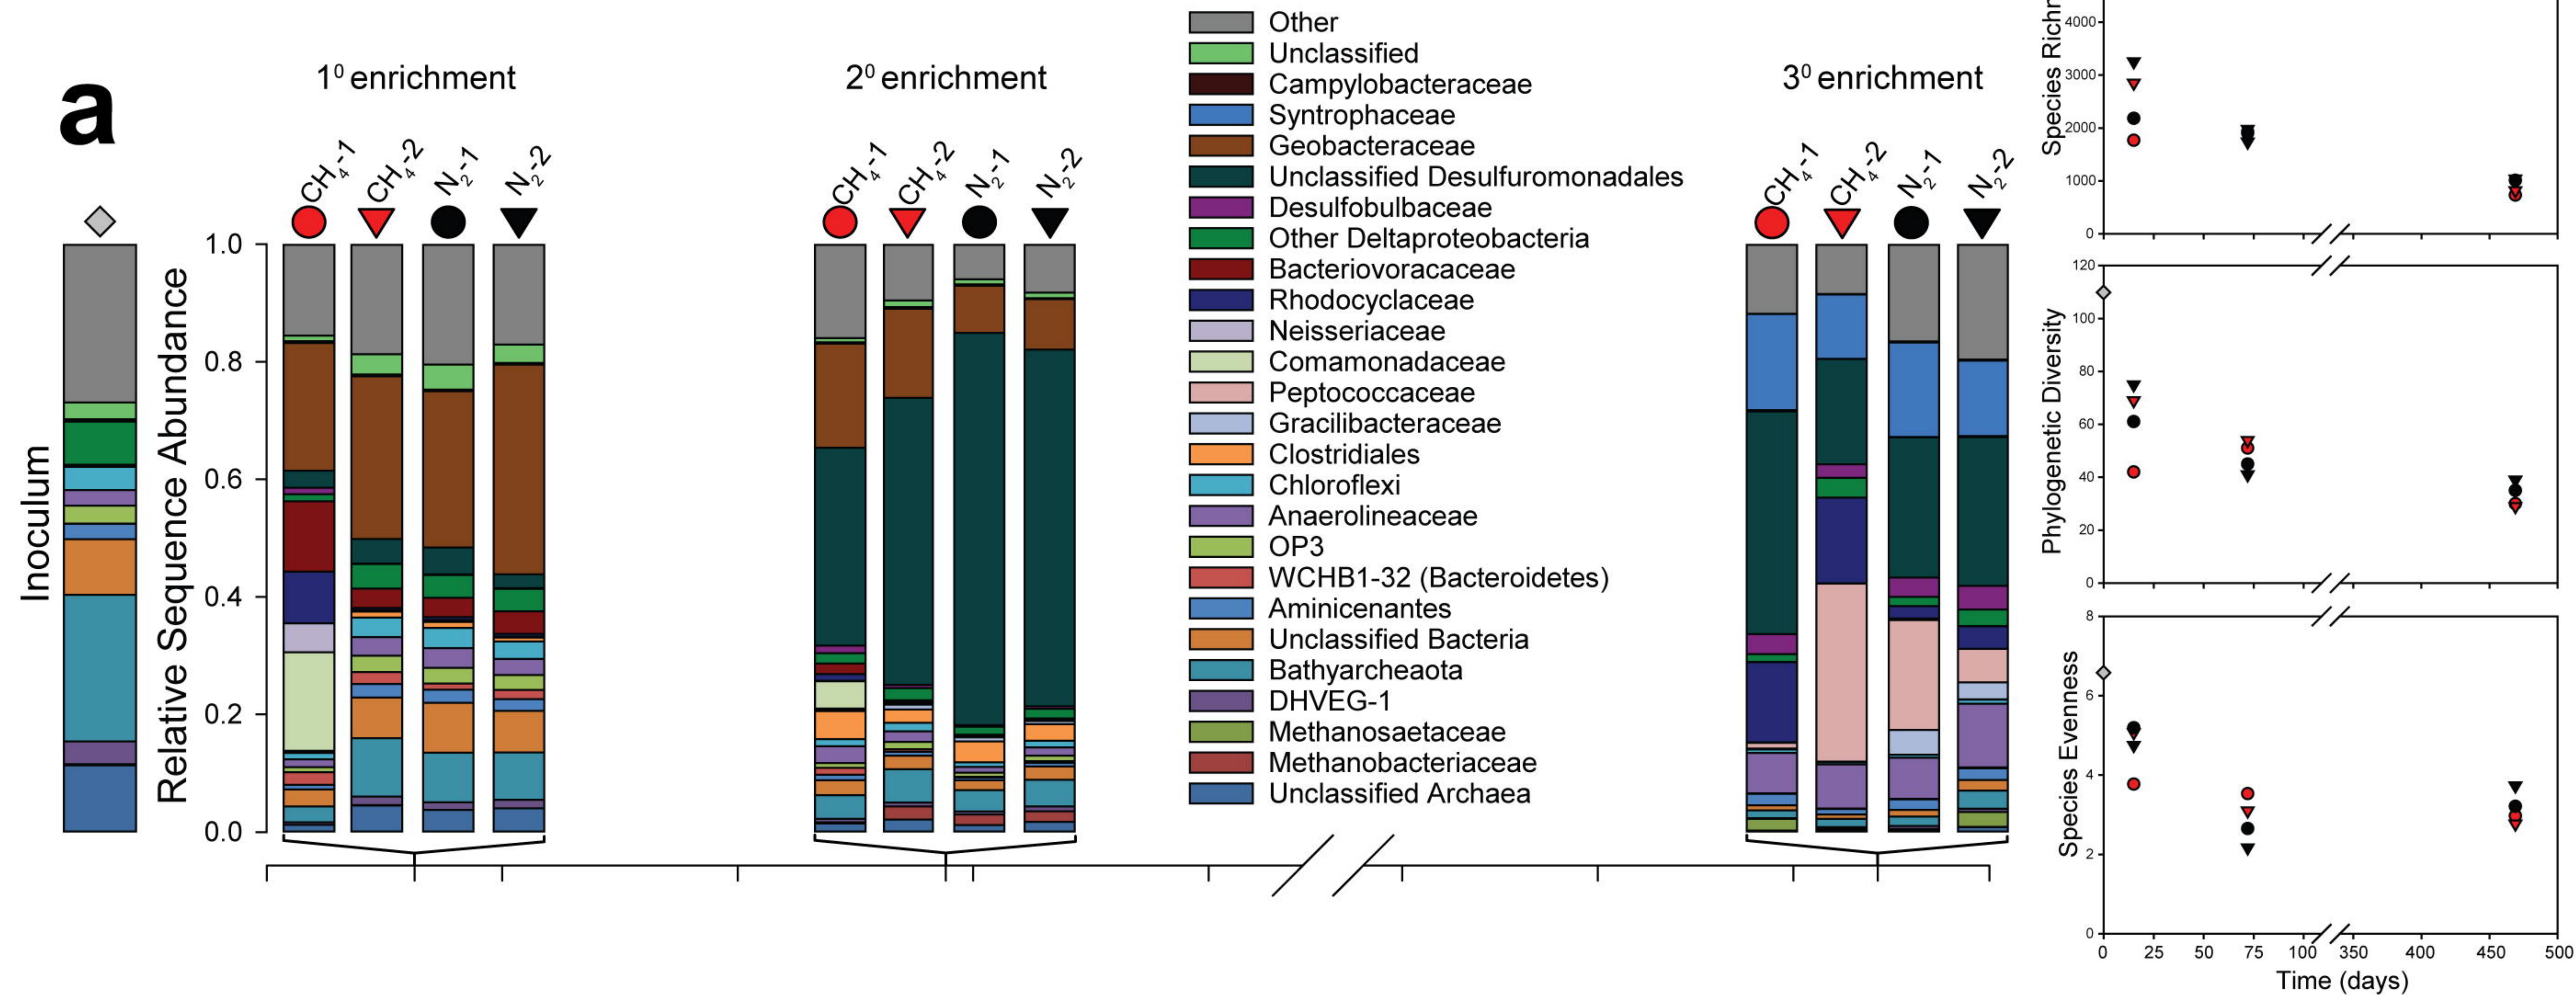

Goethite

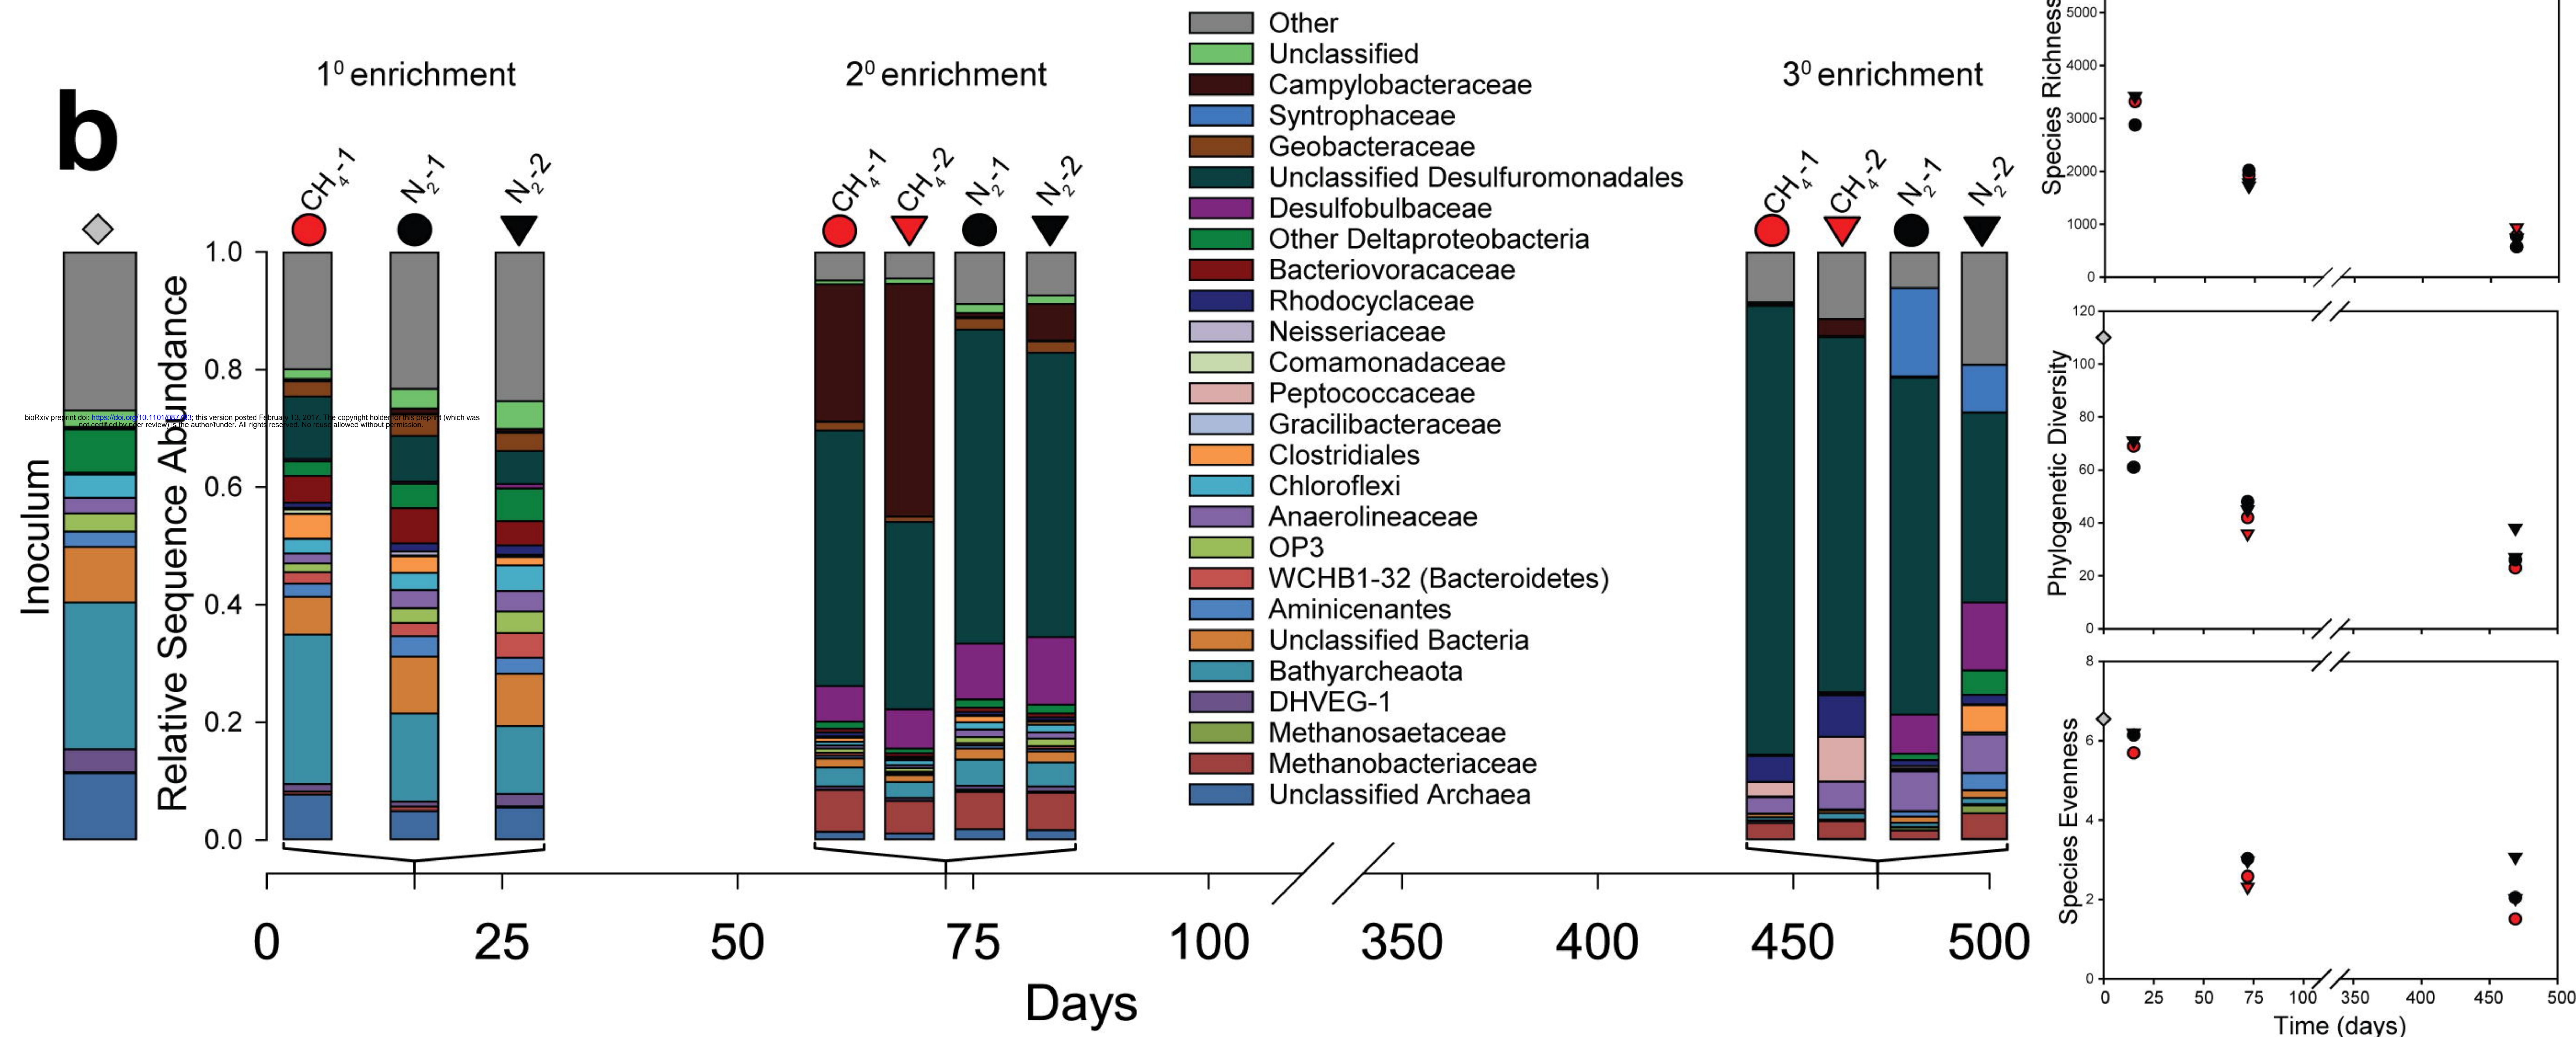

Source: http://biorxiv.org/content/10.1101/087783v2.full.pdf
